# Supplementary material for: Molecular structure controlled self-assembly of pyridine appended fluorophores: multi-stimuli fluorescence responses and fabricating rewritable/self-erasable fluorescent platforms
Source: Royal Society of Chemistry journal article supplement (doi:10.1039/d0ma00736f), 2020-12-12
Supplement: d0ma00736f1.pdf [file d0ma00736f1.pdf]

## Electronic Supplementary Information (ESI)

### Molecular Structure Controlled Self-Assembly of Pyridine Appended Fluorophores: Multi-stimuli Fluorescence responses and Fabricating Rewritable/Self-Erasable Fluorescent Platforms

Parthasarathy Gayathri,<sup>[a]</sup> Mehboobali Pannipara,<sup>[b,c]</sup> Abdullah G. Al-Sehemi,<sup>[b,c]</sup> Dohyun Moon\*<sup>[d]</sup> Savarimuthu Philip Anthony\*<sup>[a]</sup>

<sup>a)</sup>School of Chemical & Biotechnology, SASTRA Deemed University, Thanjavur-613401, Tamil Nadu, India. Fax: +914362264120; Tel: +914362264101; E-mail: philip@biotech.sastra.edu

<sup>b)</sup>Department of chemistry, King Khalid University, Abha 61413, Saudi Arabia.

<sup>c)</sup>Research center for Advanced Materials Science, King Khalid University, Abha 61413, Saudi Arabia.

<sup>b)</sup>Beamline Department, Pohang Accelerator Laboratory, 80 Jigokro-127beongil, Nam-gu, Pohang, Gyeongbuk, Korea, Email: dmoon@postech.ac.kr

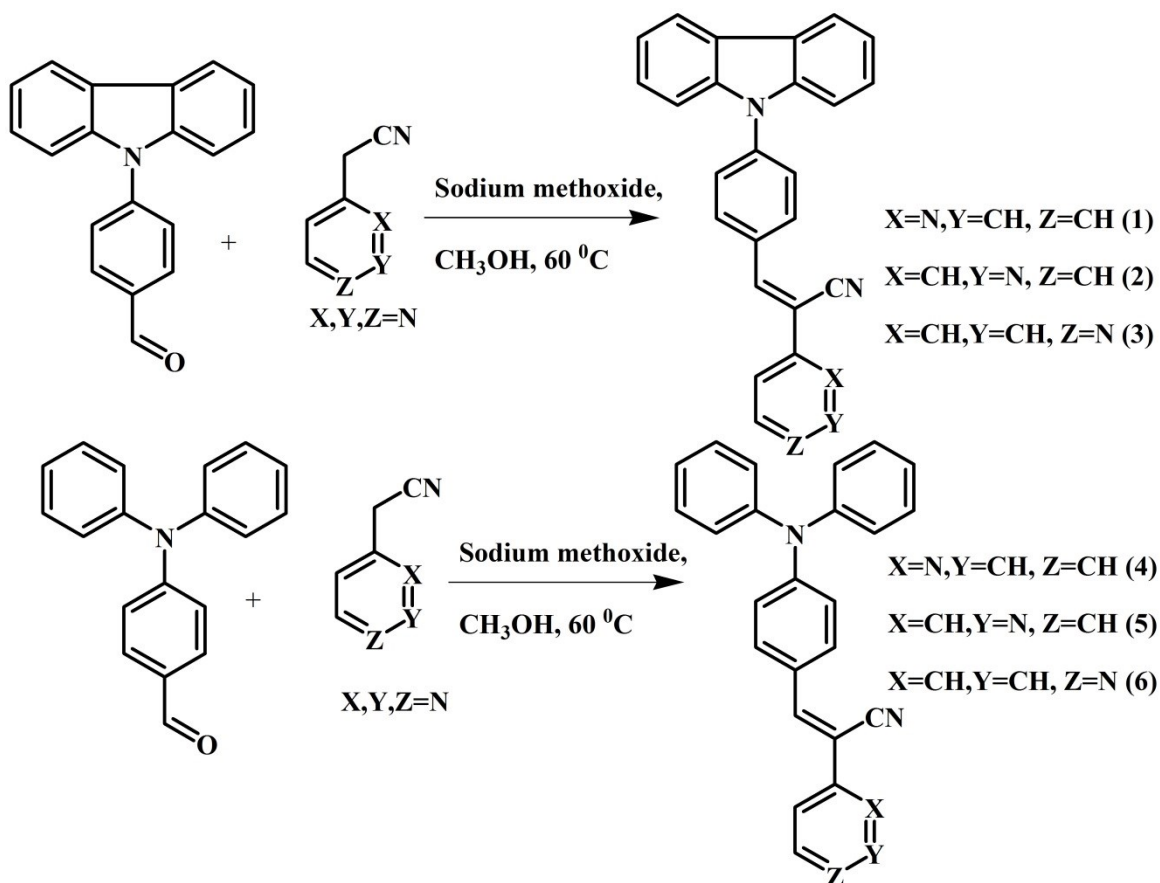

Scheme S1. Synthesis of carbazole and triphenylamine based isomers (1-6).

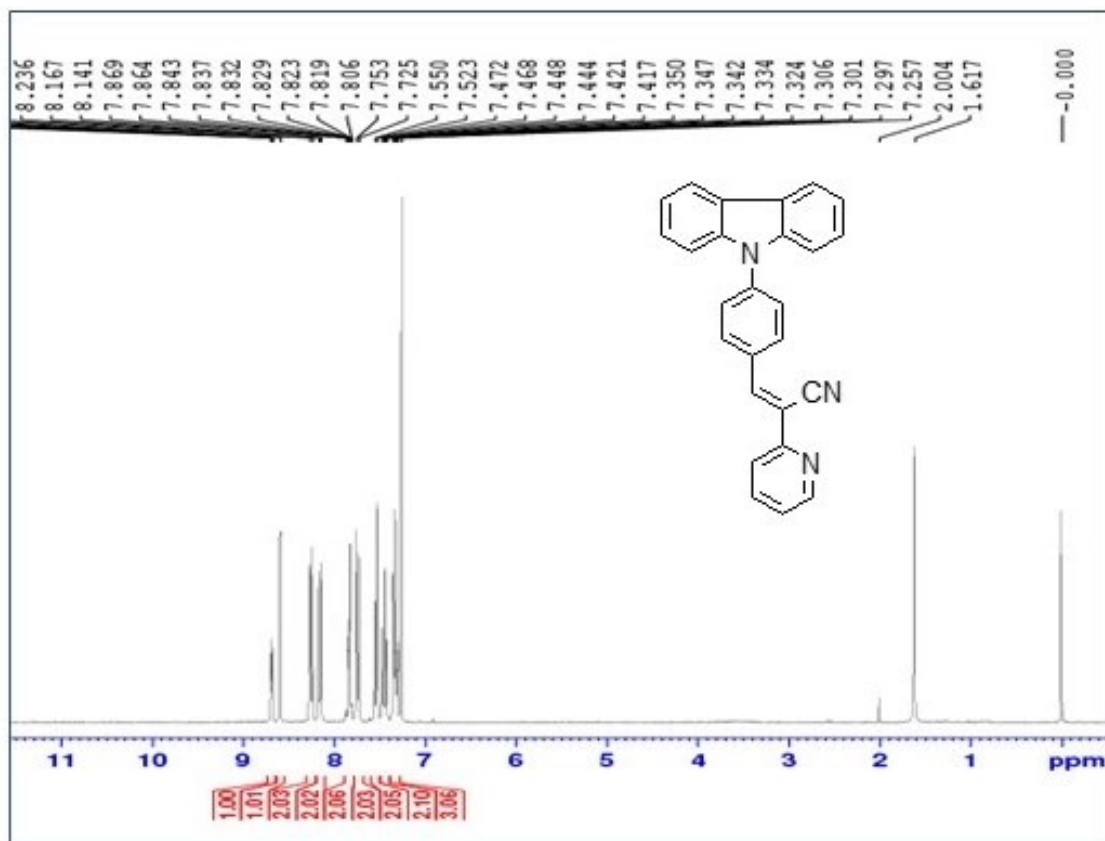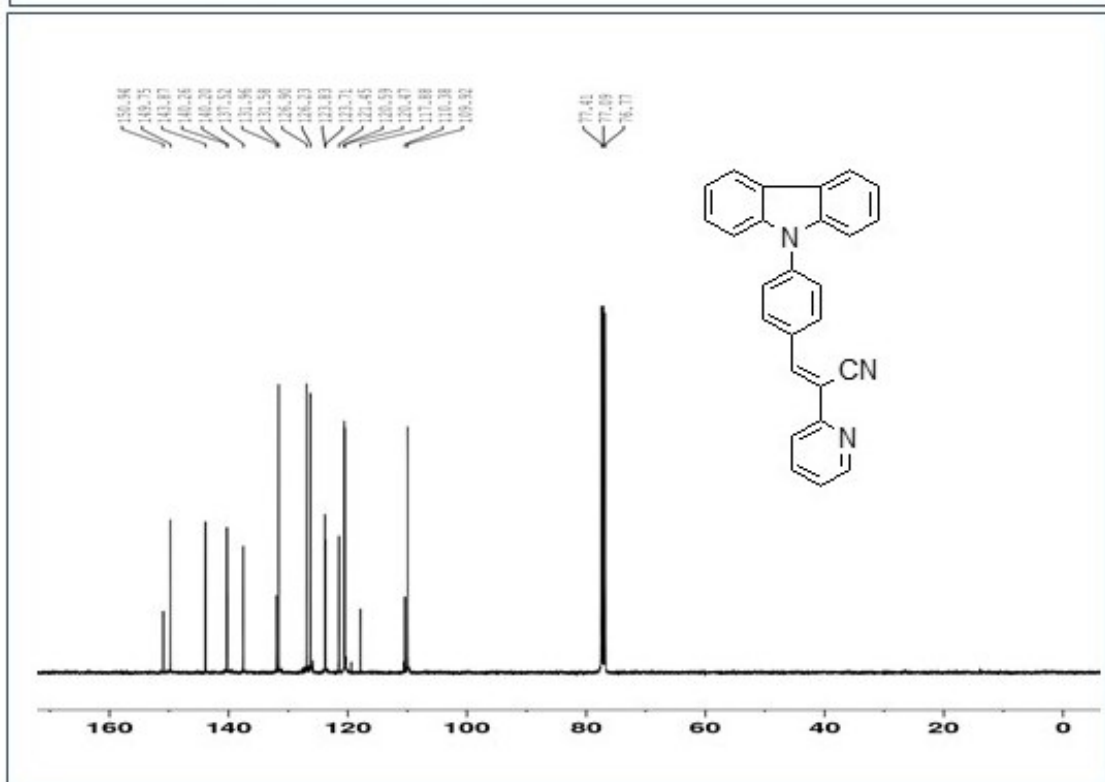

$^1H$  and  $^{13}C$  NMR of **1**.

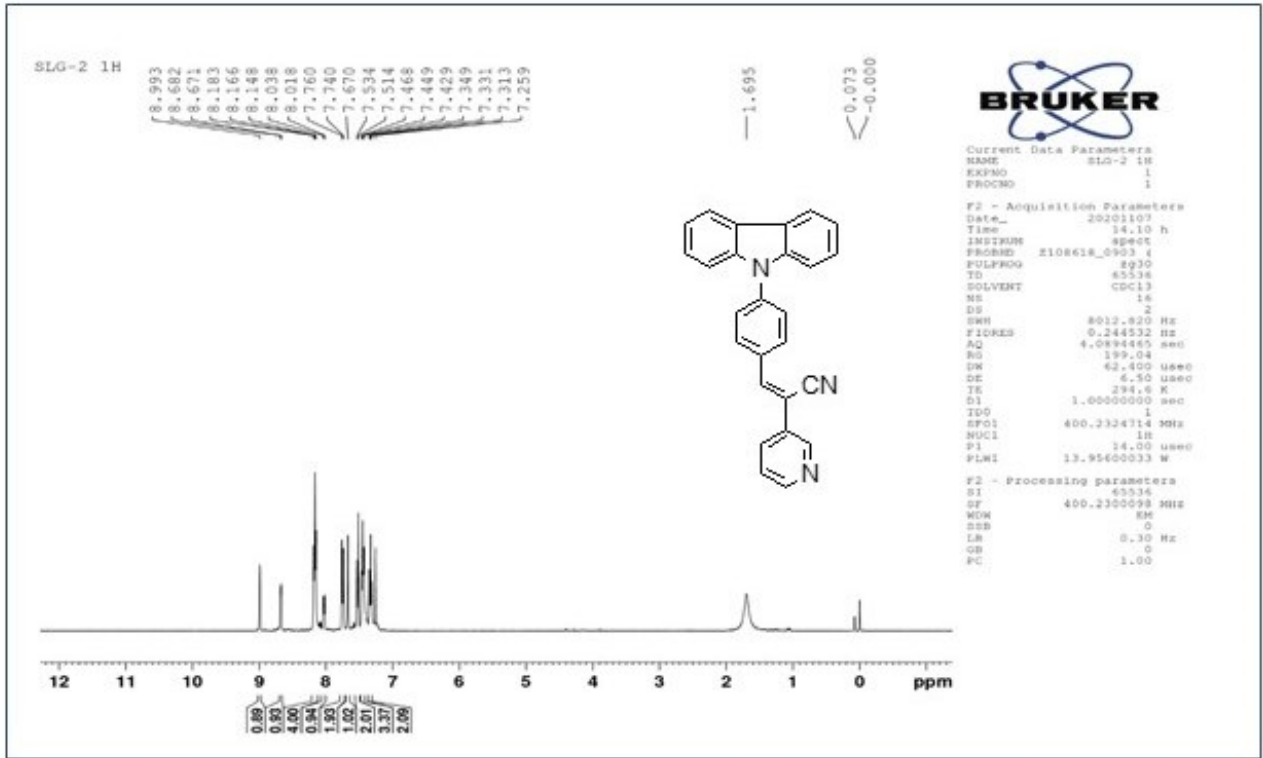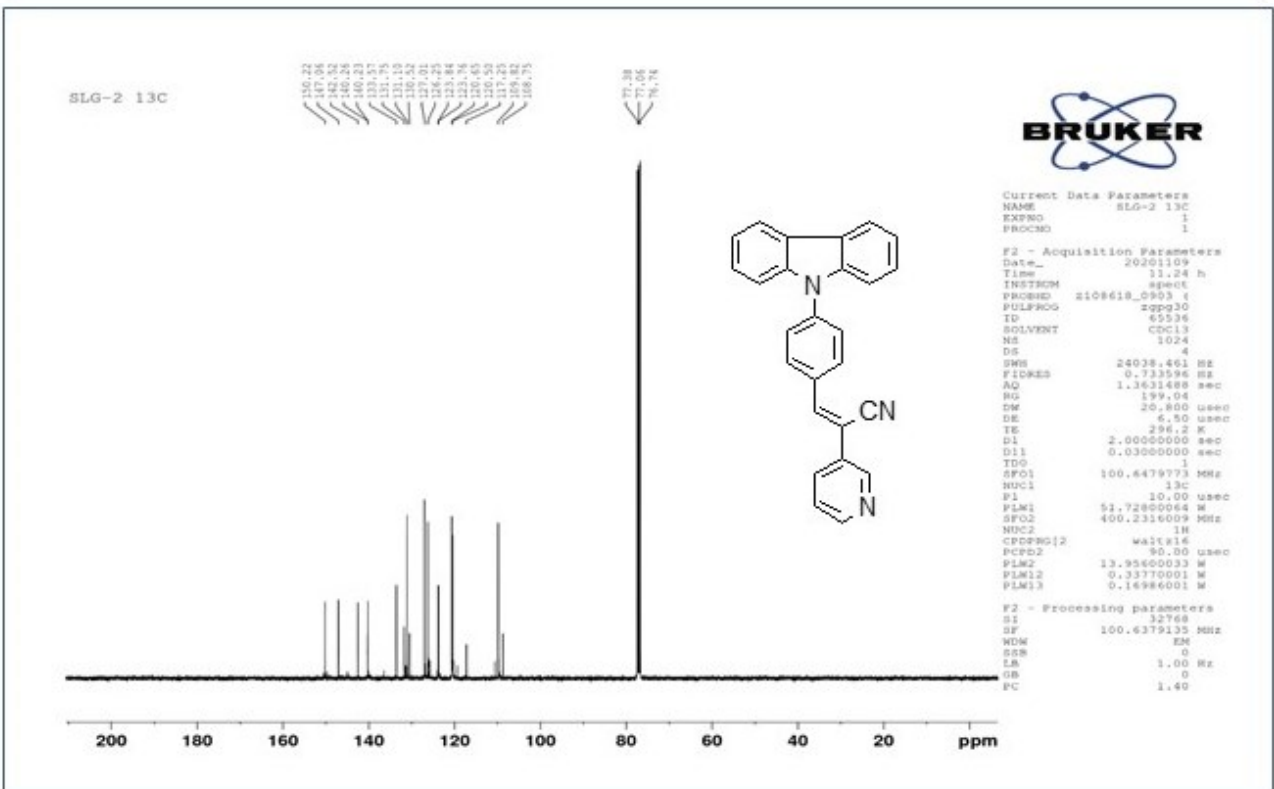

$^1\text{H}$  and  $^{13}\text{C}$  NMR of **2**.

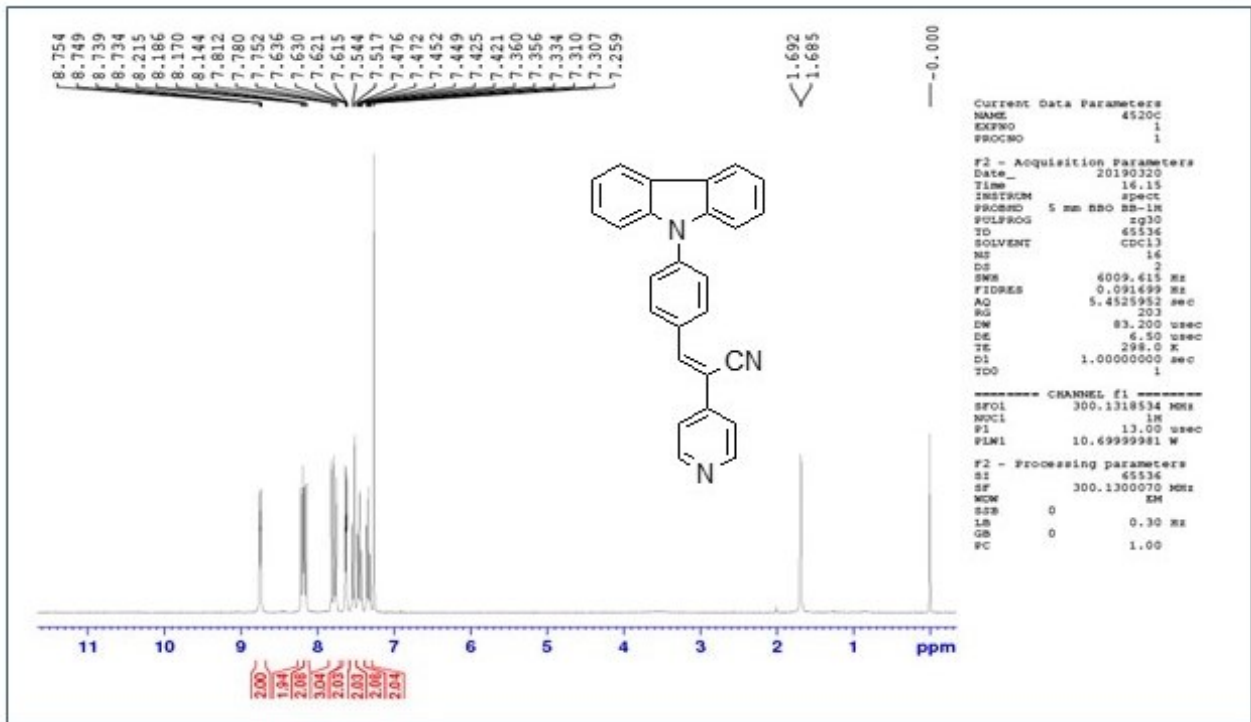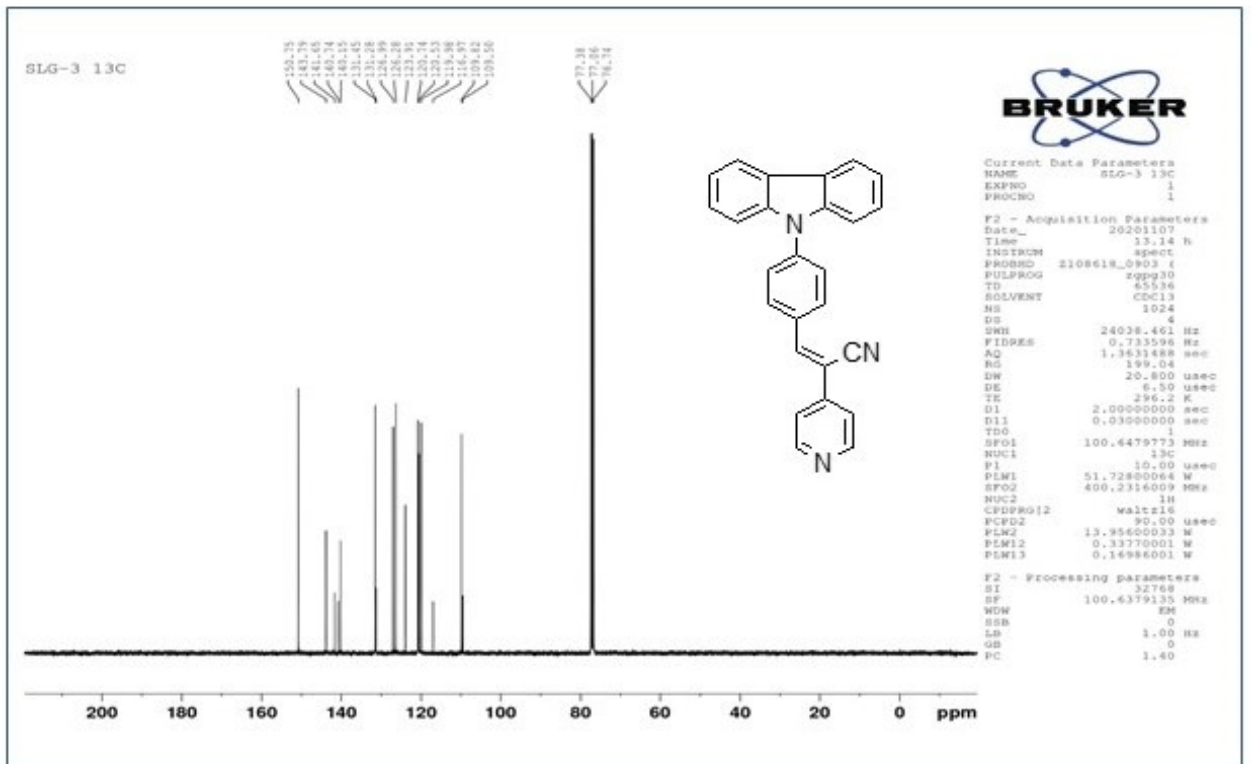

$^1\text{H}$  and  $^{13}\text{C}$  NMR of **3**.

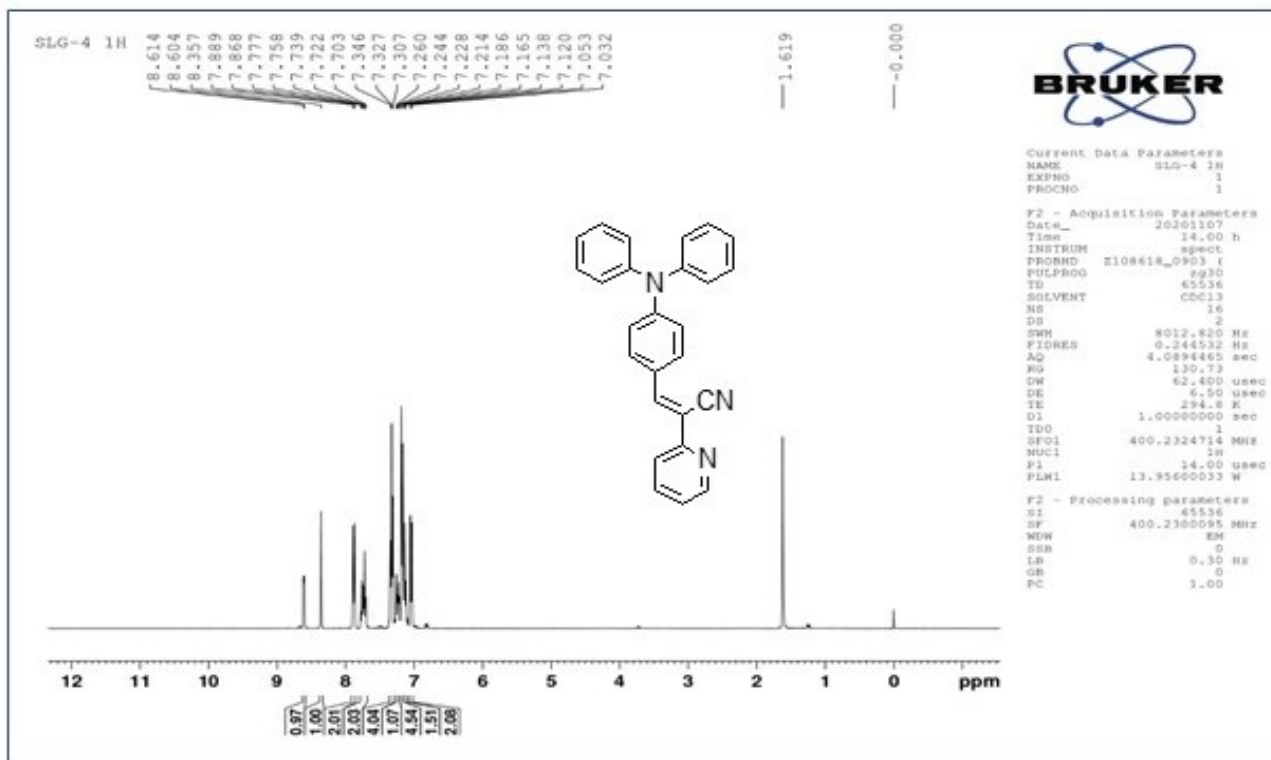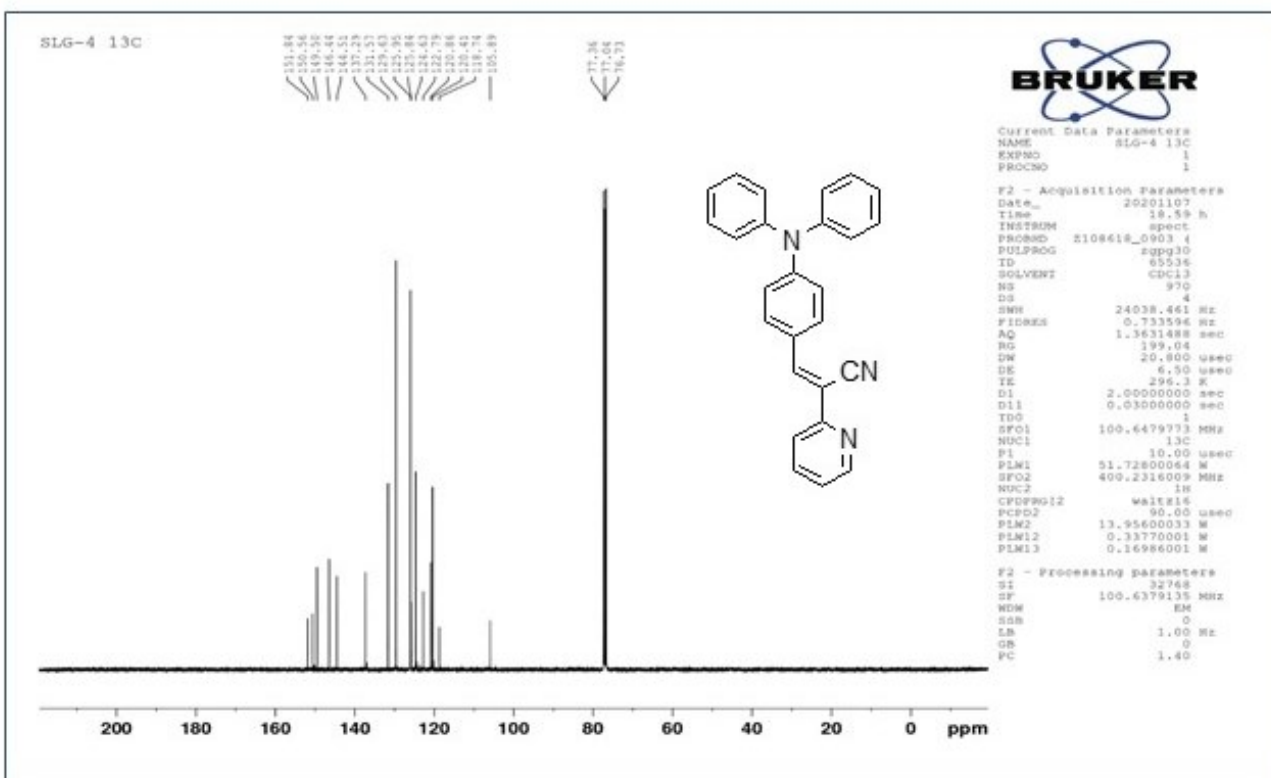



$^1\text{H}$  and  $^{13}\text{C}$  NMR of **4**.

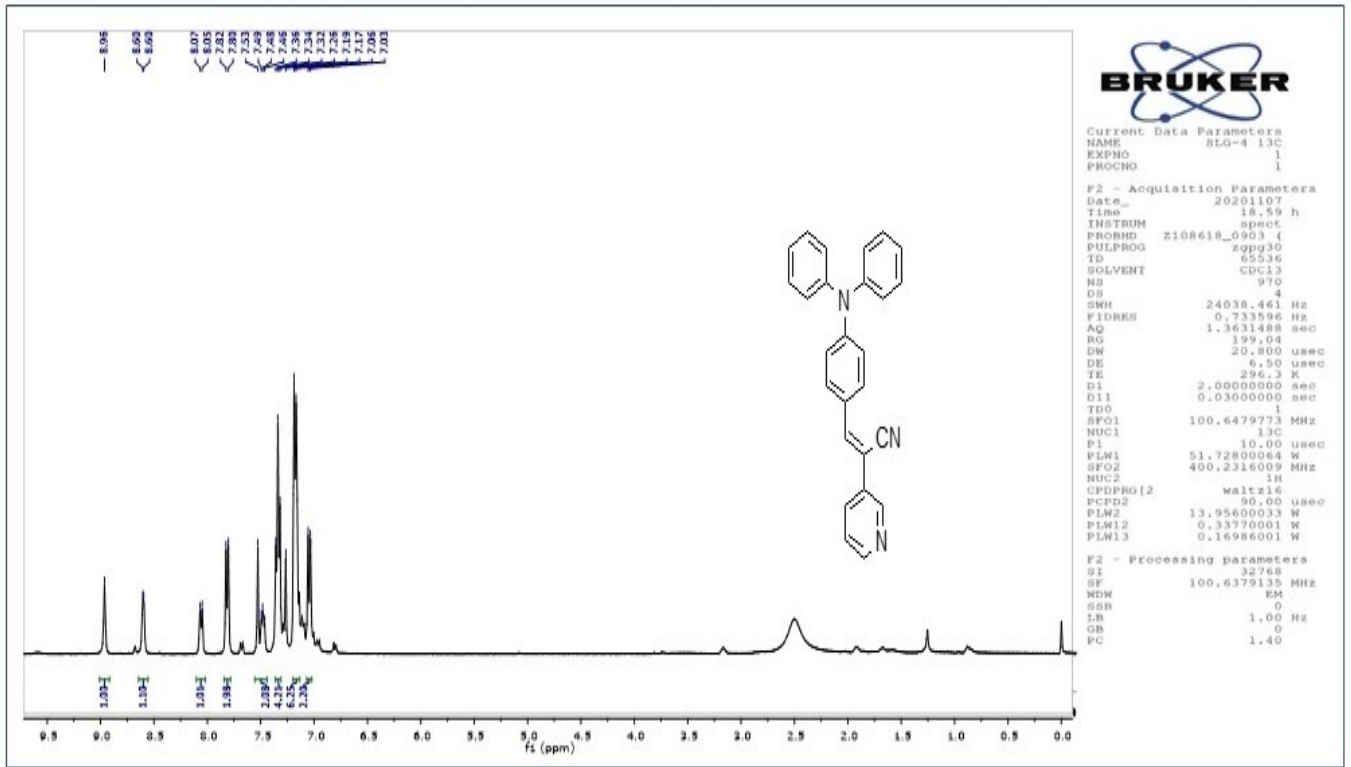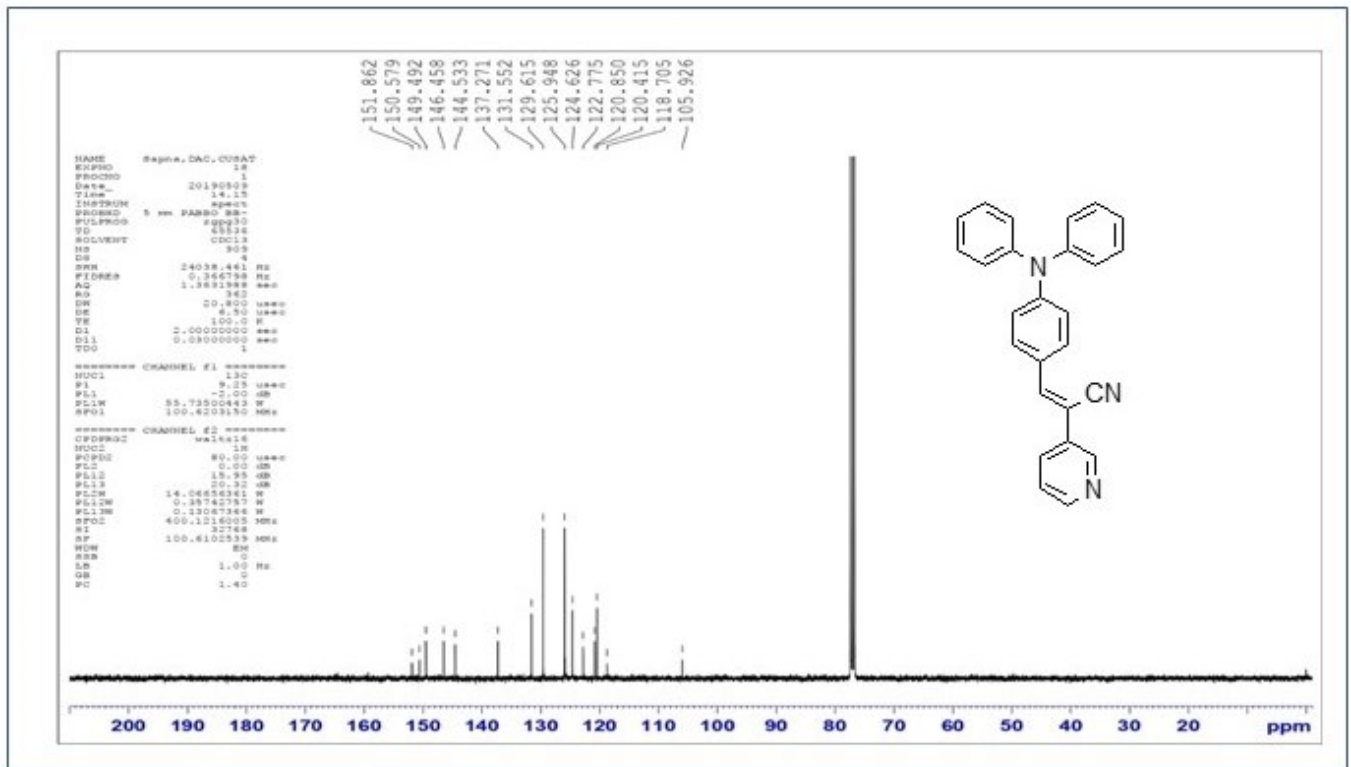

$^1\text{H}$  and  $^{13}\text{C}$  NMR of **5**.

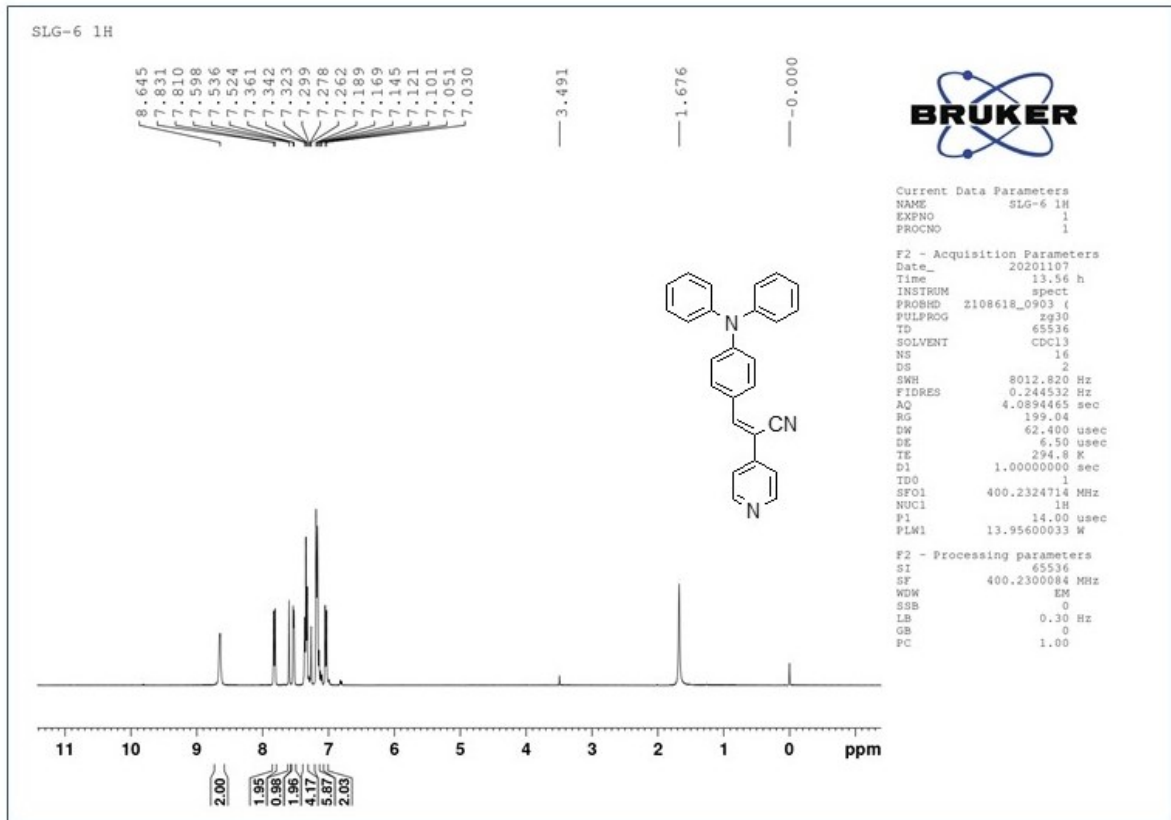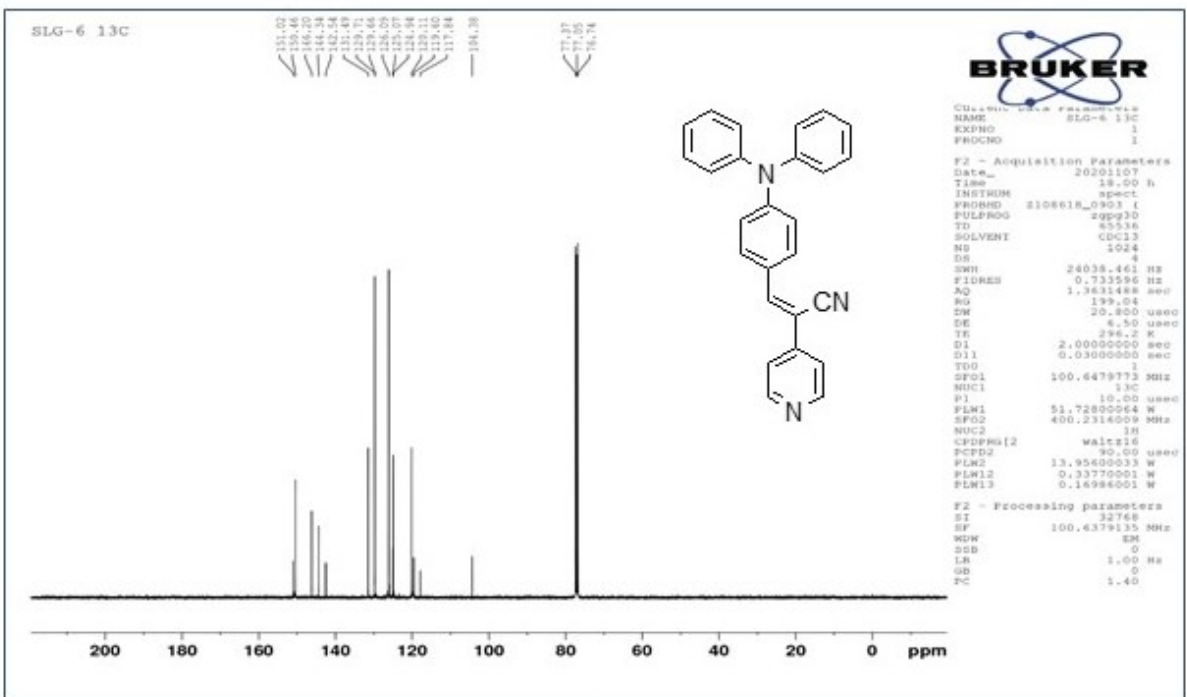

$^1\text{H}$  and  $^{13}\text{C}$  NMR of **6**.

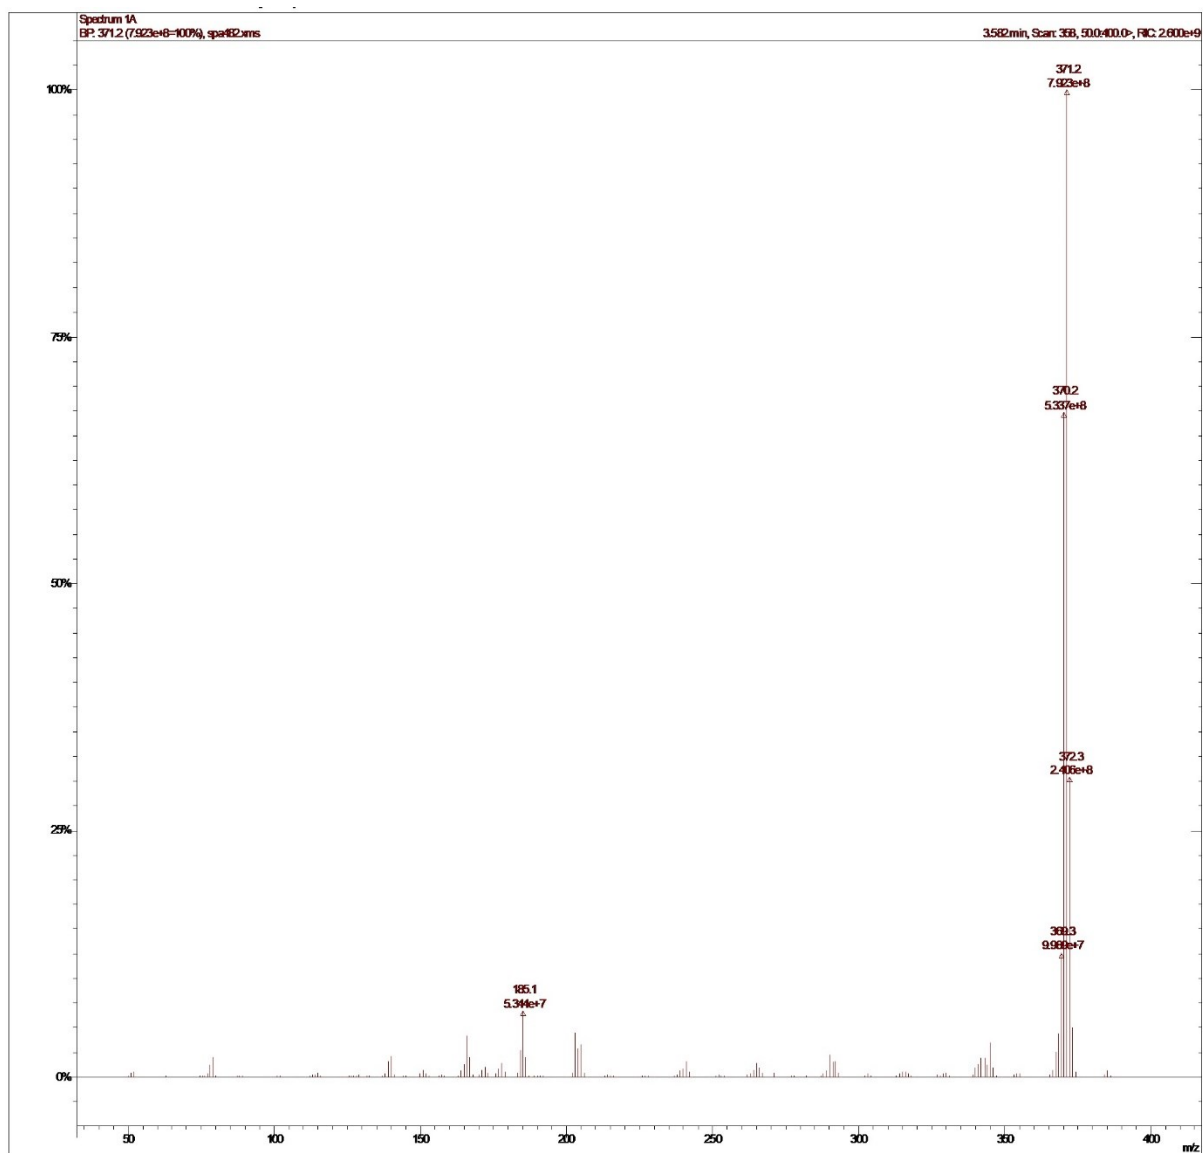

**1**: m/z calculated for  $\text{C}_{26}\text{H}_{17}\text{N}_3$  (M + H): 371.14, found: 371.2

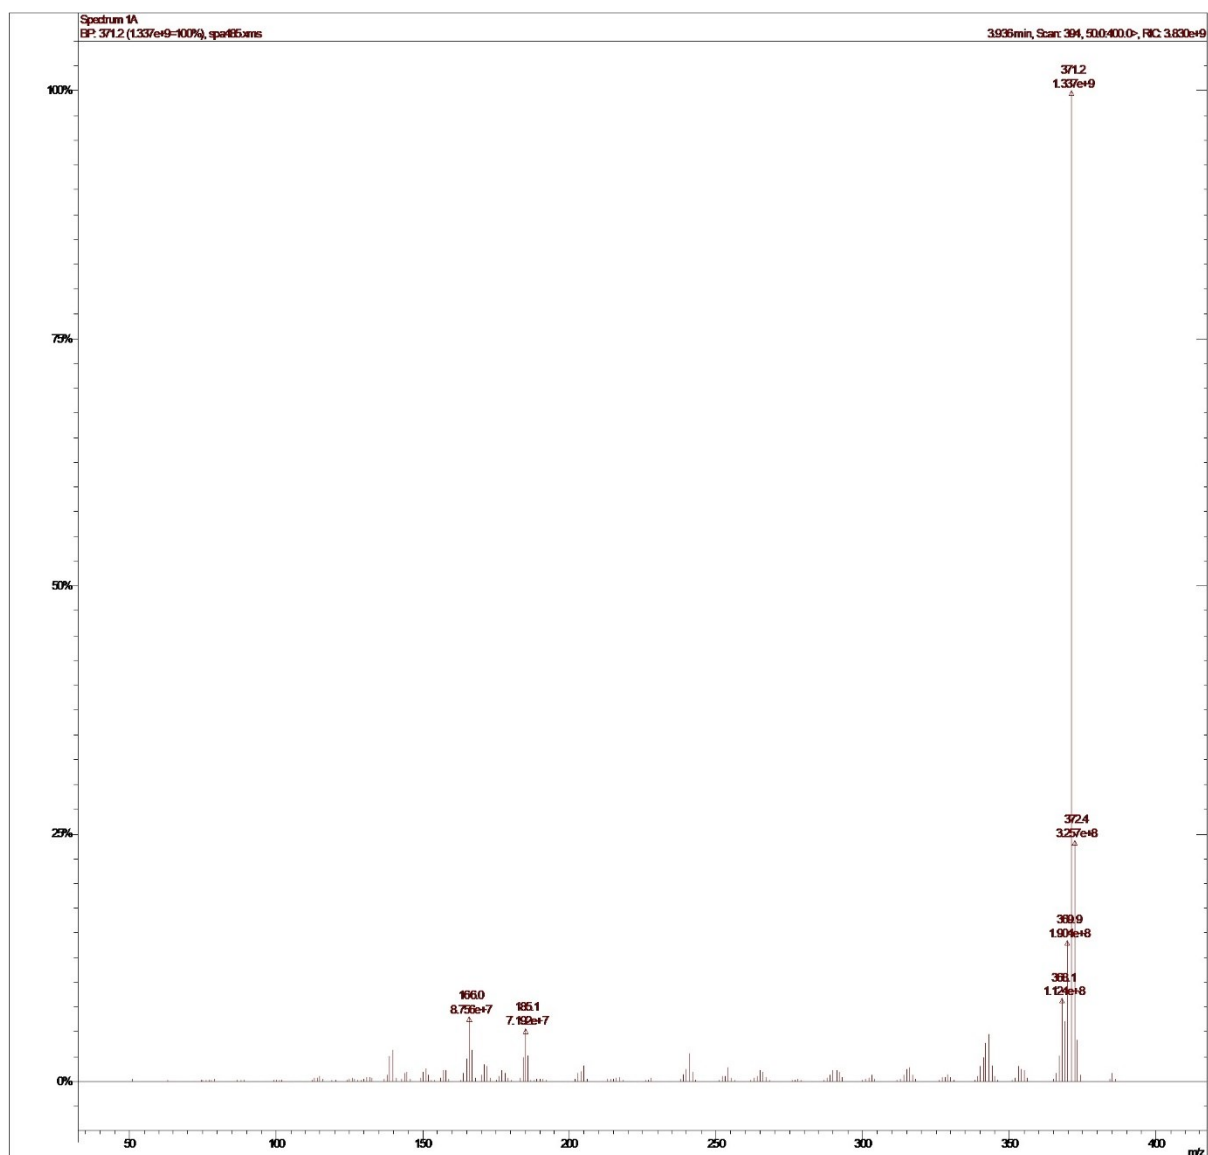

2: m/z calculated for  $C_{26}H_{17}N_3$  (M + H): 371.14, found: 371.2

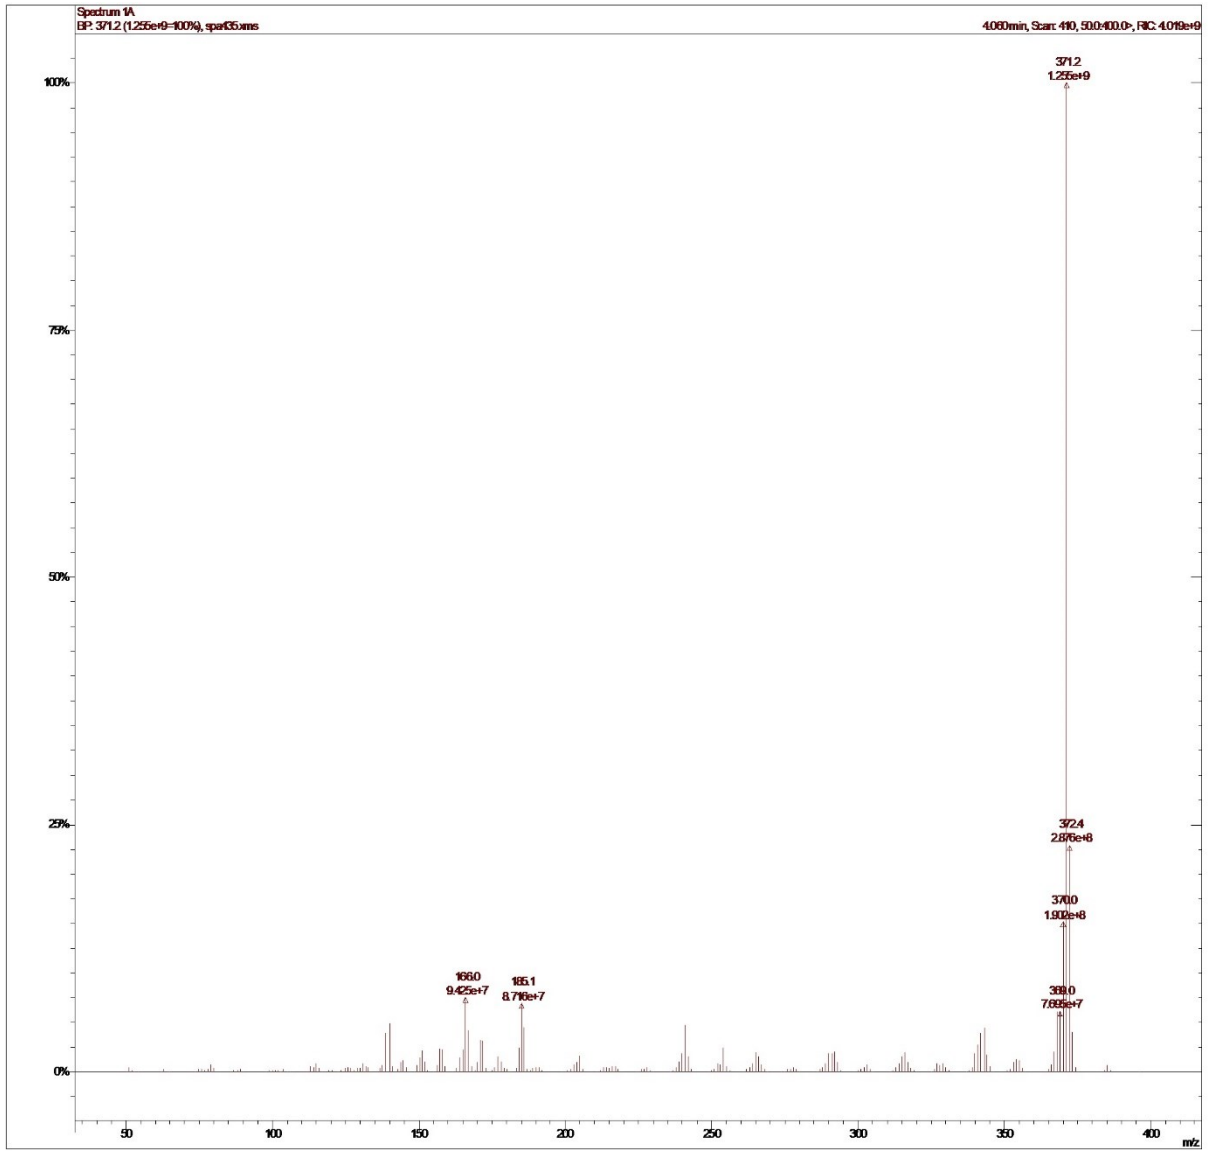

3: m/z calculated for  $C_{26}H_{17}N_3$  (M + H): 371.14, found: 371.2

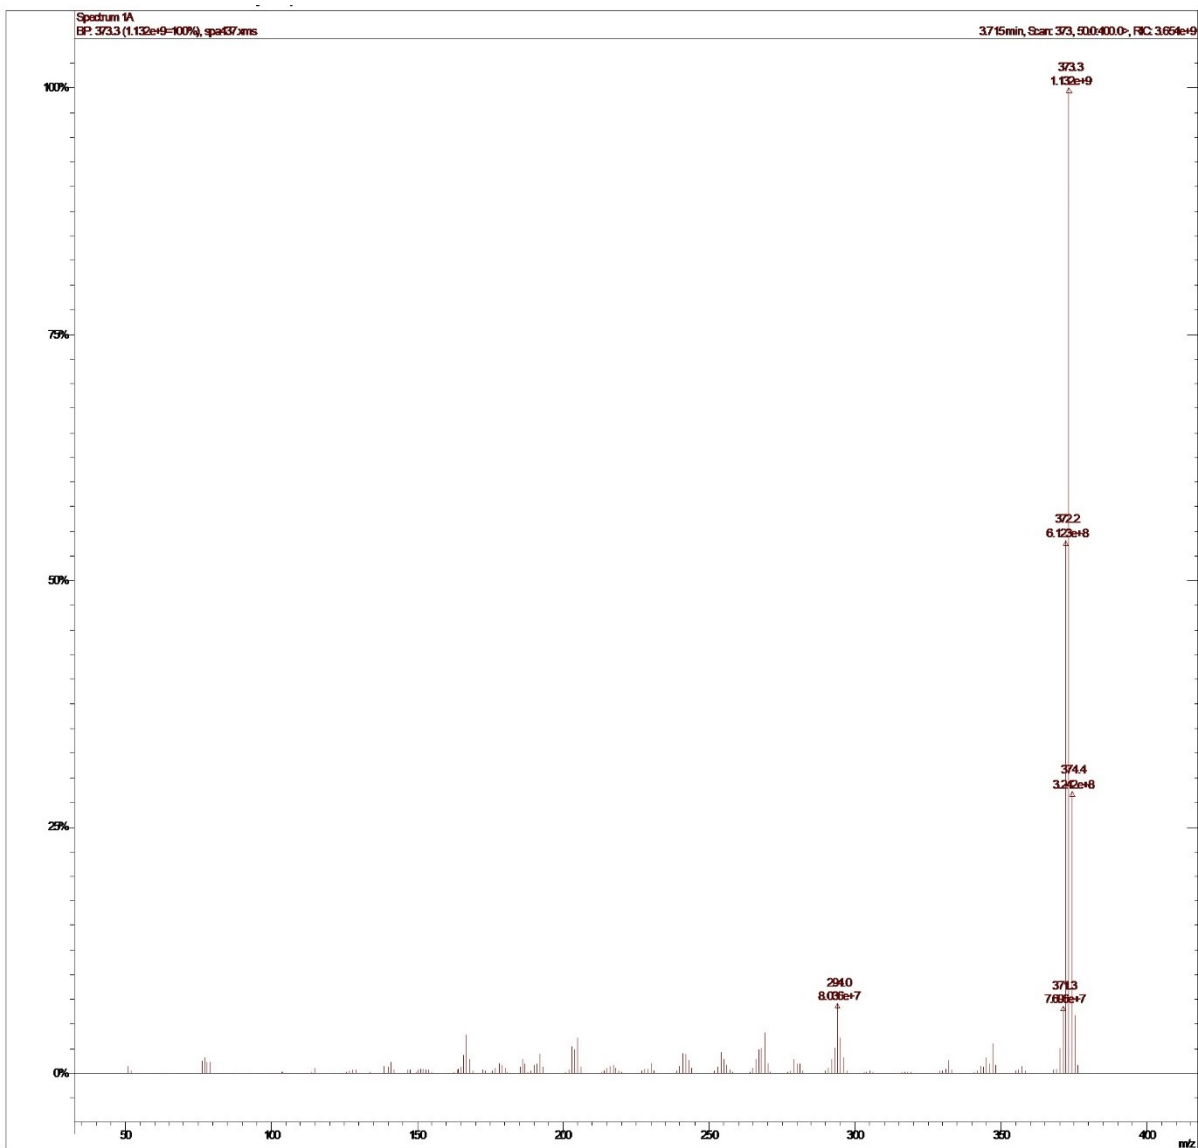

4: m/z calculated for  $C_{26}H_{19}N_3$  (M + H): 373.16, found: 373.3



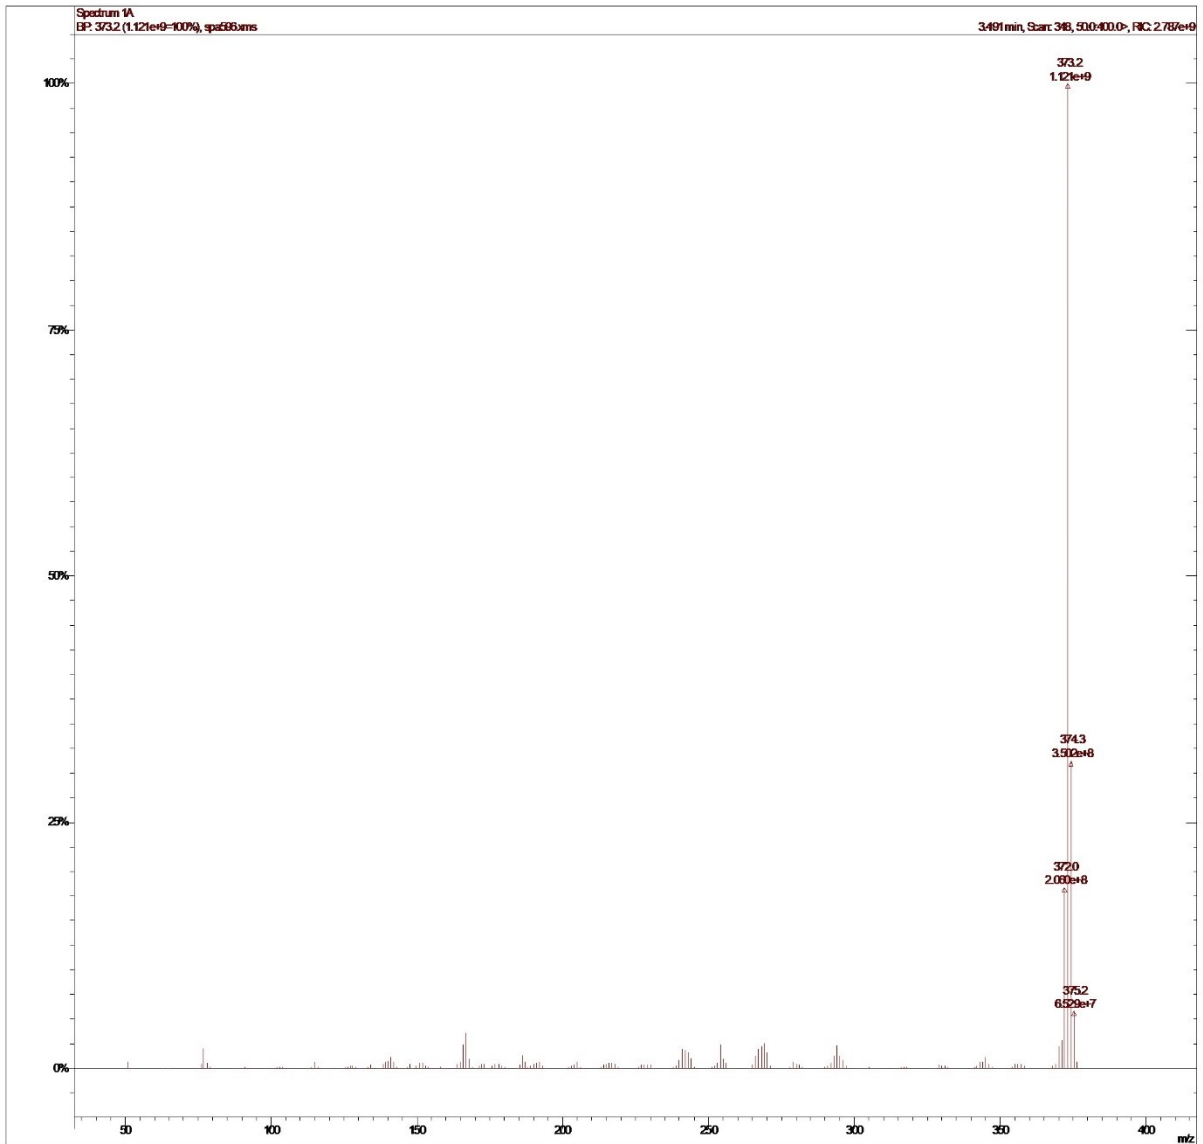

5: m/z calculated for  $C_{26}H_{19}N_3$  (M + H): 373.16, found: 373.2

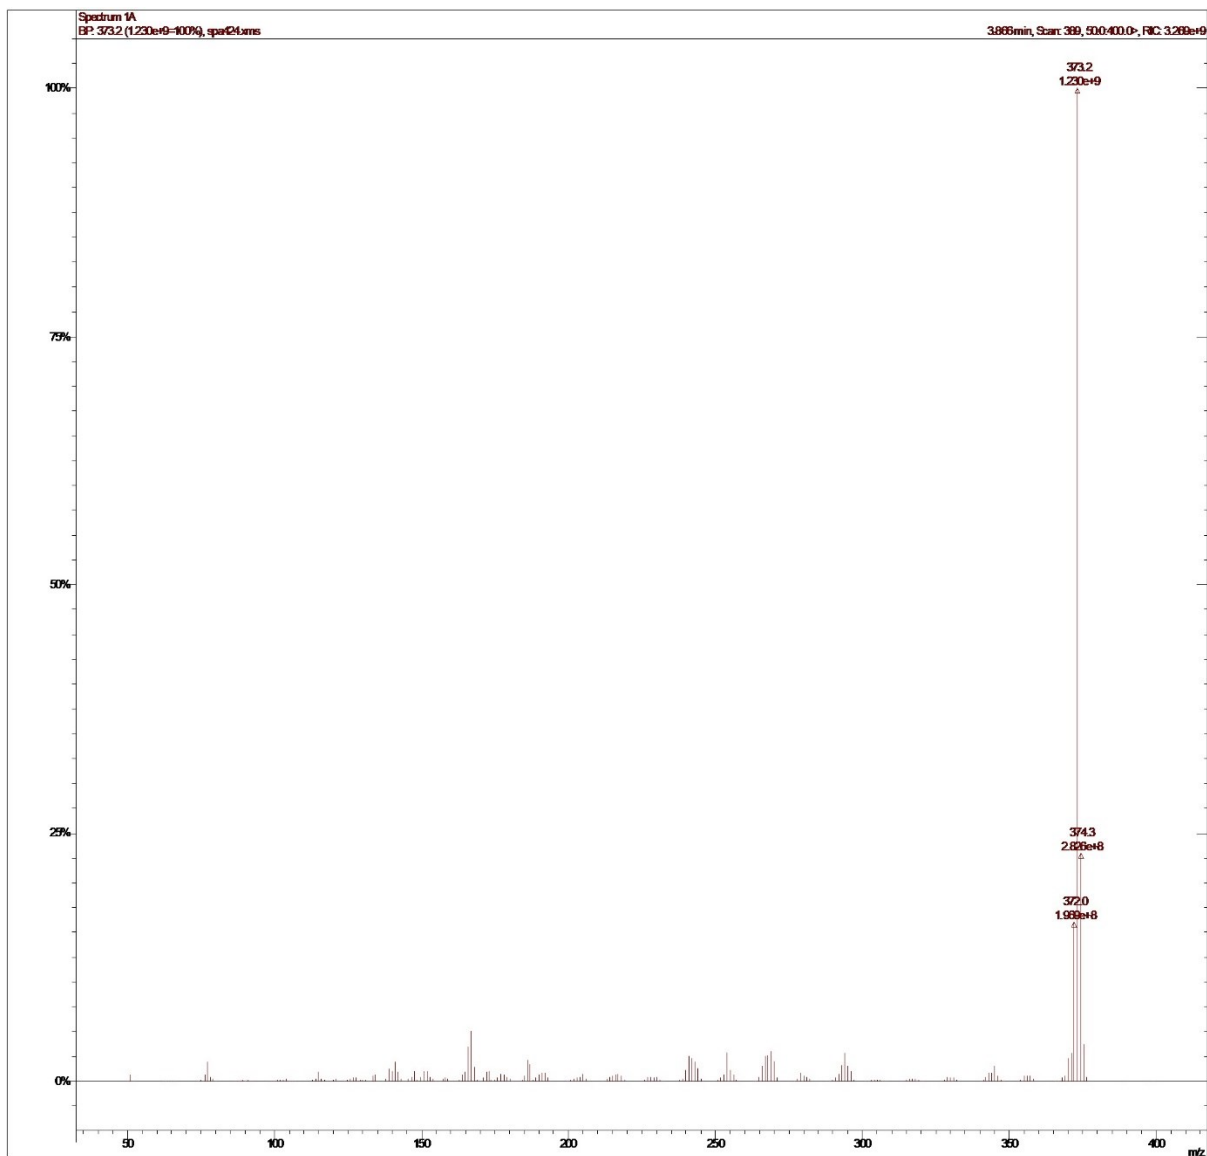

6: m/z calculated for  $C_{26}H_{19}N_3$  (M + H): 373.16, found: 373.2

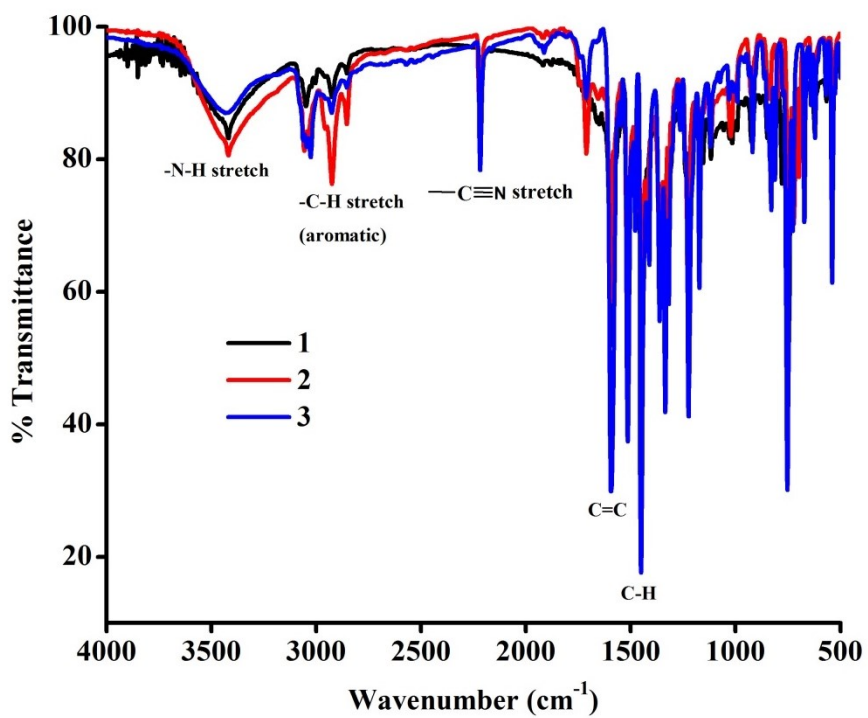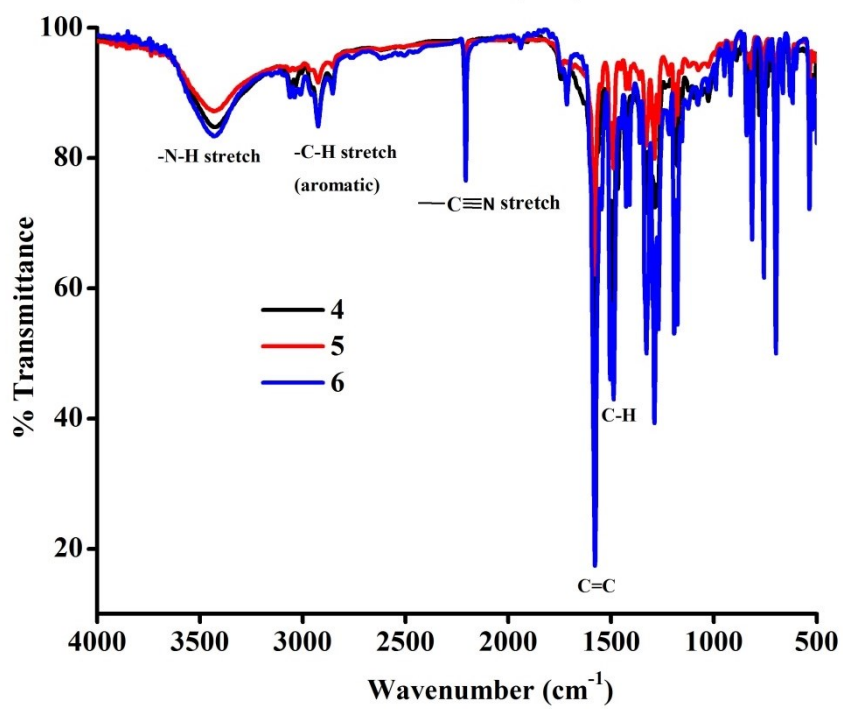

IR spectra of 1-6.

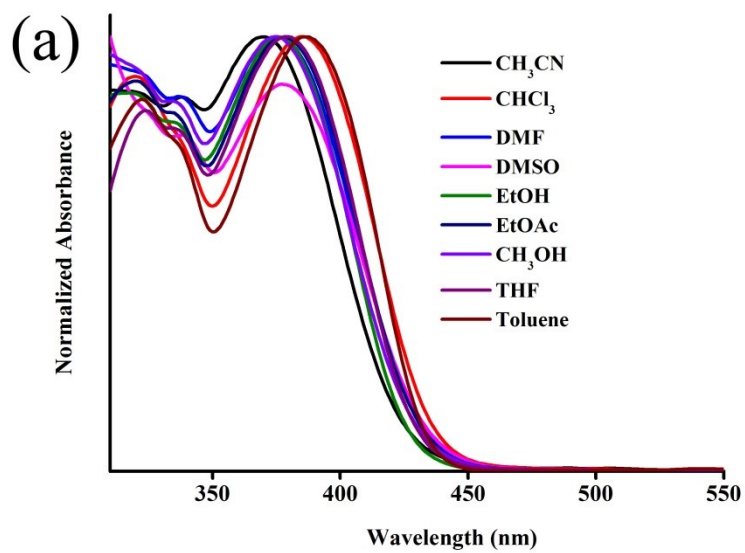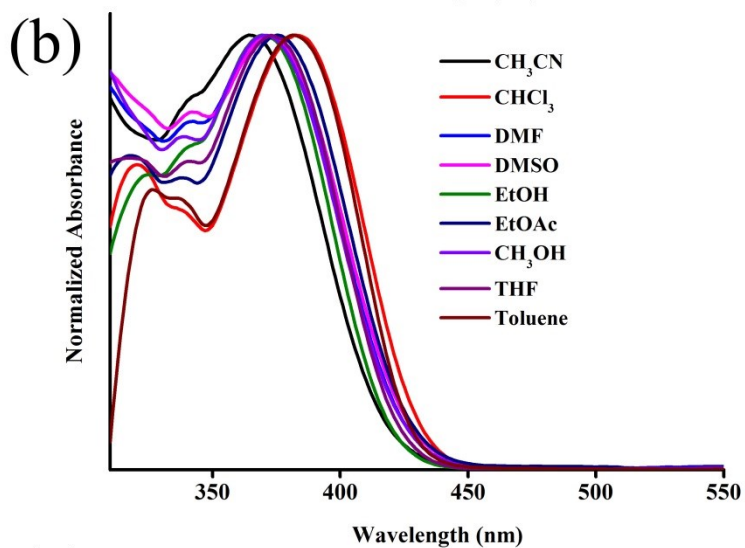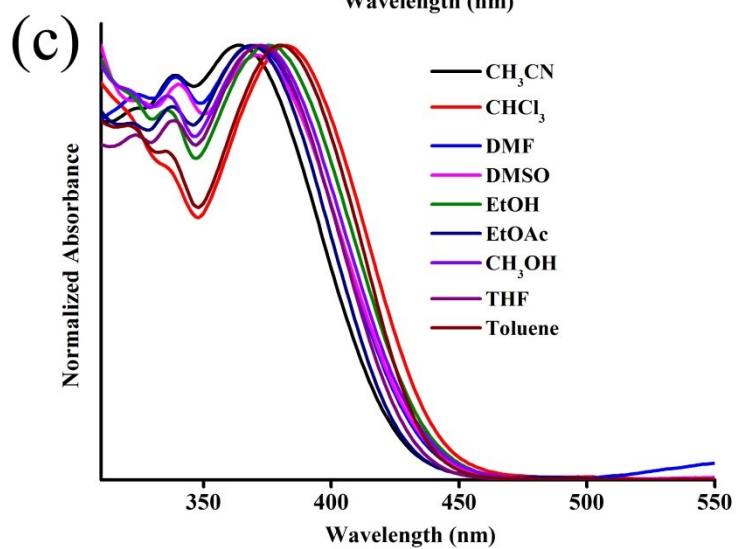

Fig. S1. Absorption spectra of (a) **1**, (b) **2** and (c) **3** in different solvents ( $10^{-4}$  M).

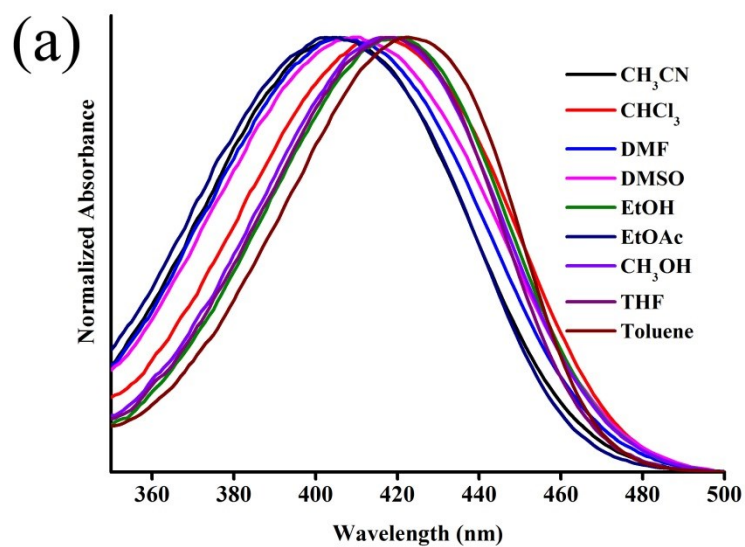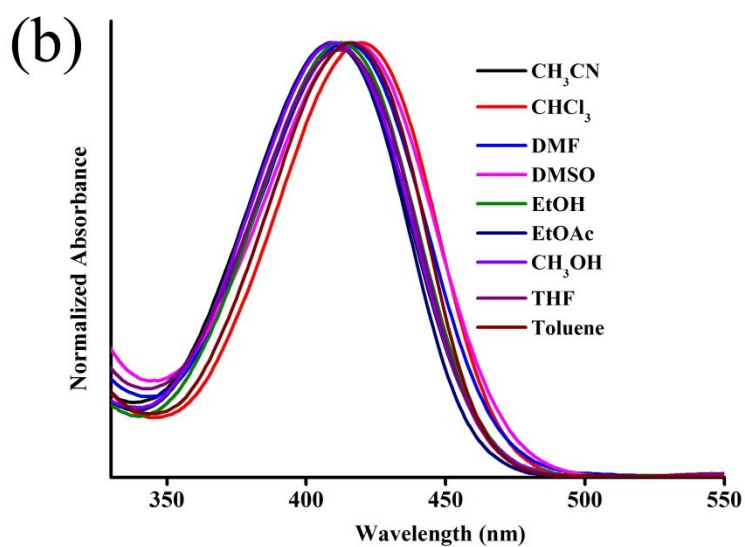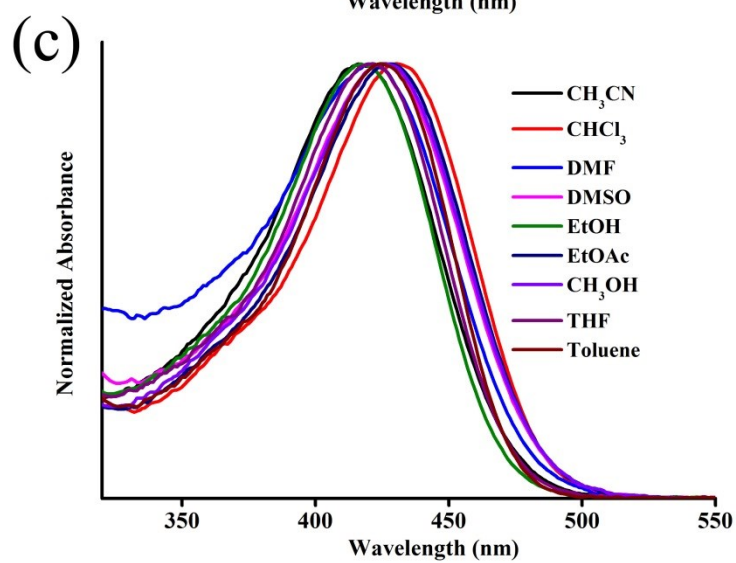

Fig. S2. Absorption spectra of (a) **4**, (b) **5** and (c) **6** in different solvents ( $10^{-4}$  M).

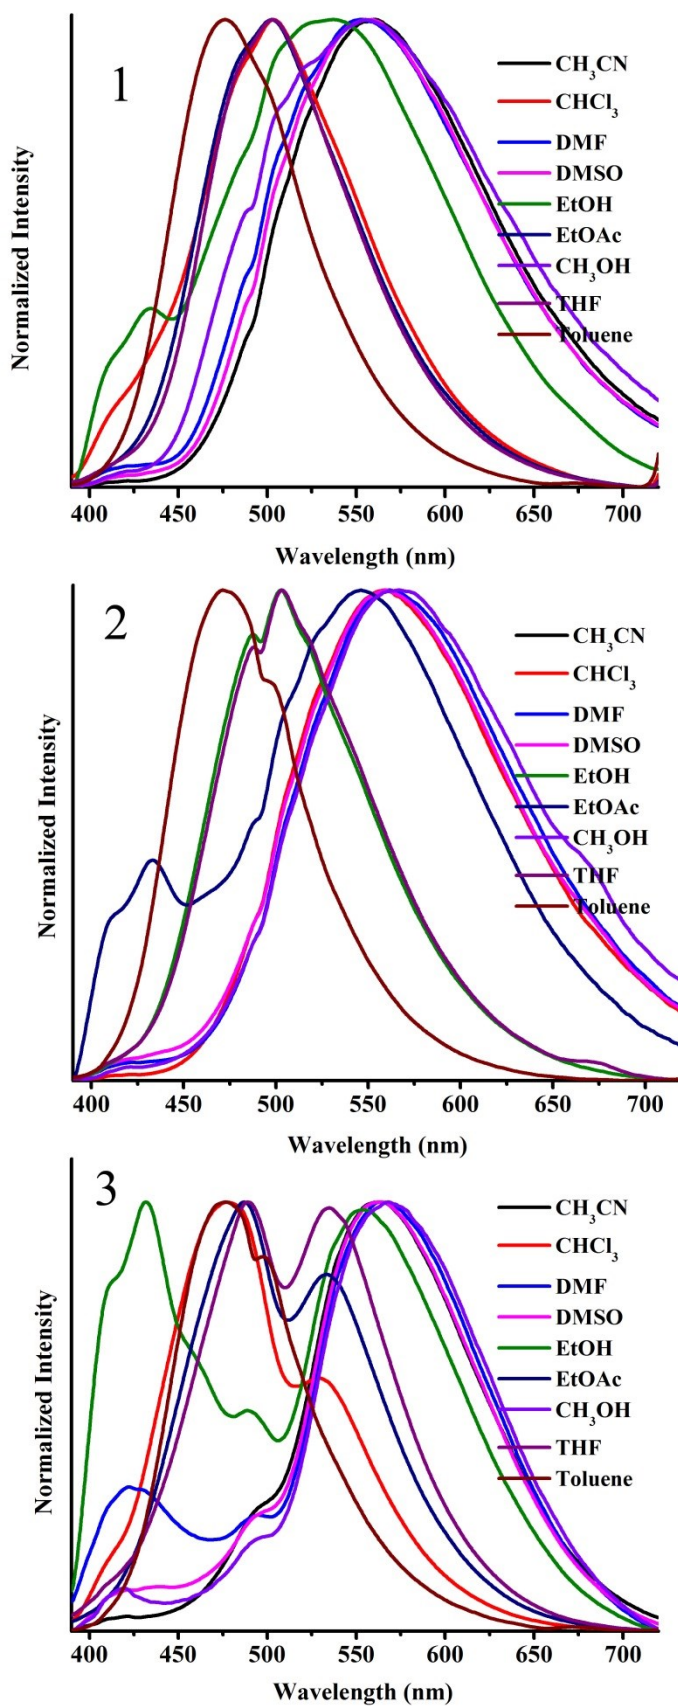

Fig. S3. Fluorescence spectra of **1-3** in different solvents ( $10^{-4}$  M).

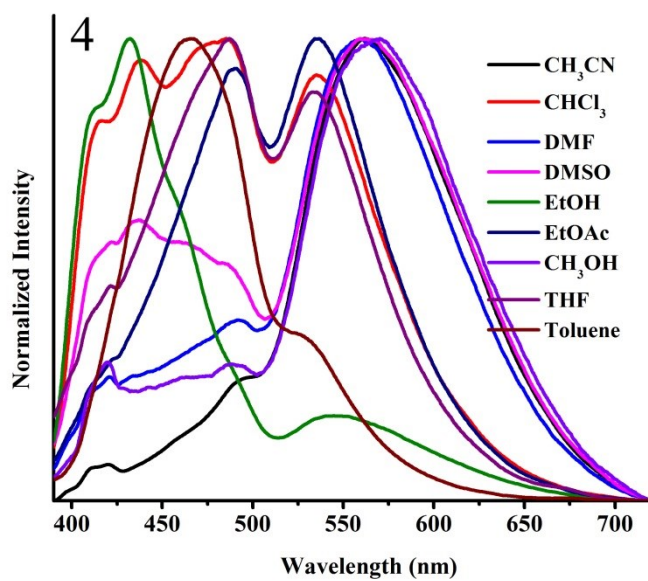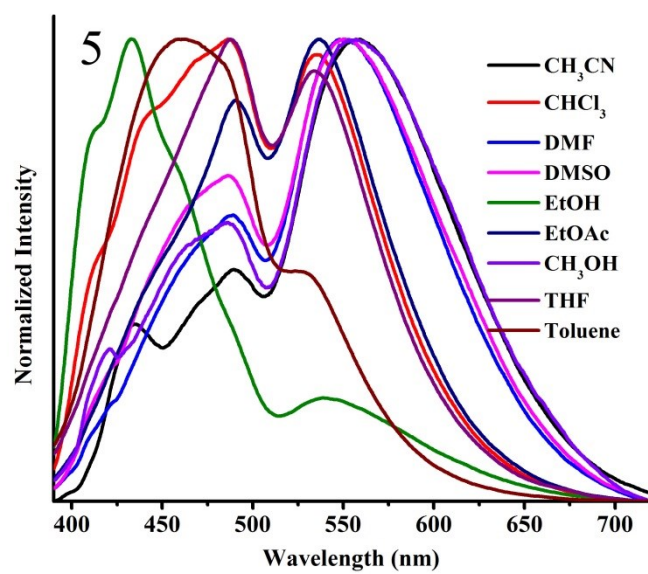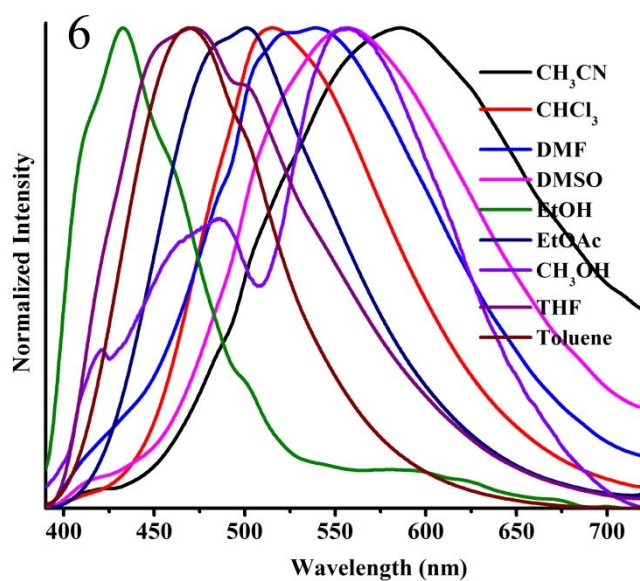

Fig. S4. Fluorescence spectra of **4-6** in different solvents ( $10^{-4}$  M).

Table S1. Fluorescence efficiency of **1-6** compared to quinine sulfate in different solvent polarity.

| Solvents           | Quantum Yield ( $\Phi_f$ ) |      |       |       |       |      |
|--------------------|----------------------------|------|-------|-------|-------|------|
|                    | 1                          | 2    | 3     | 4     | 5     | 6    |
| CH <sub>3</sub> CN | 0.02                       | 0.01 | 0.034 | 0.007 | 0.010 | 0.03 |
| CHCl <sub>3</sub>  | 0.23                       | 0.15 | 0.27  | 0.74  | 0.62  | 0.34 |
| DMF                | 0.06                       | 0.12 | 0.15  | 0.21  | 0.32  | 0.1  |
| DMSO               | 0.07                       | 0.06 | 0.07  | 0.19  | 0.21  | 0.12 |
| Ethyl acetate      | 0.081                      | 0.19 | 0.23  | 0.20  | 0.23  | 0.29 |
| Ethanol            | 0.05                       | 0.05 | 0.07  | 0.08  | 0.09  | 0.09 |
| Methanol           | 0.001                      | 0.05 | 0.02  | 0.04  | 0.03  | 0.01 |
| THF                | 0.11                       | 0.08 | 0.15  | 0.28  | 0.37  | 0.31 |
| Toluene            | 0.15                       | 0.19 | 0.23  | 0.30  | 0.51  | 0.48 |



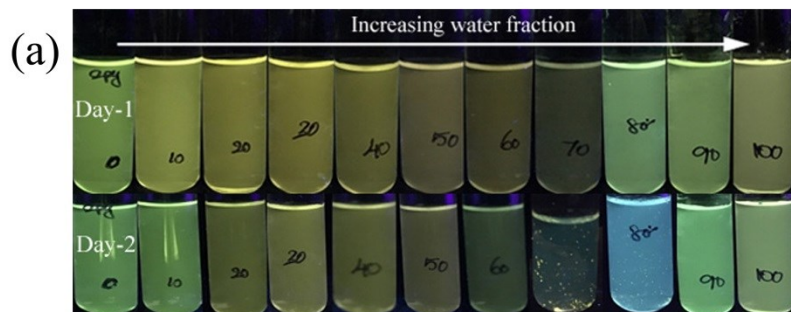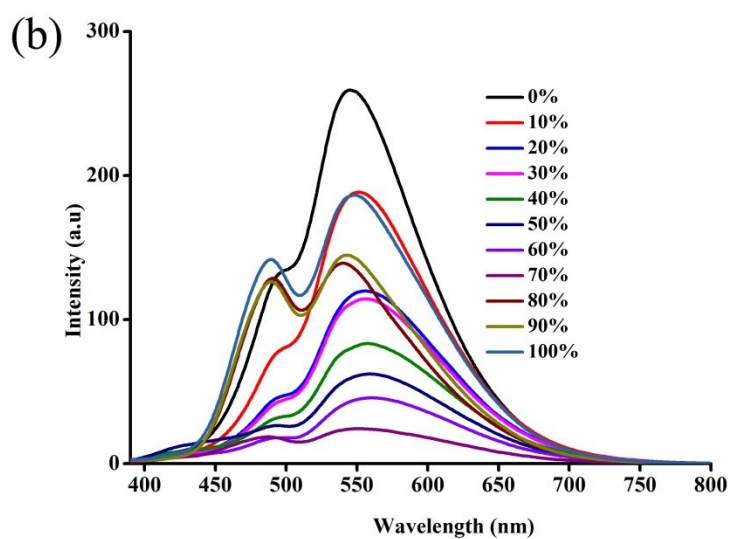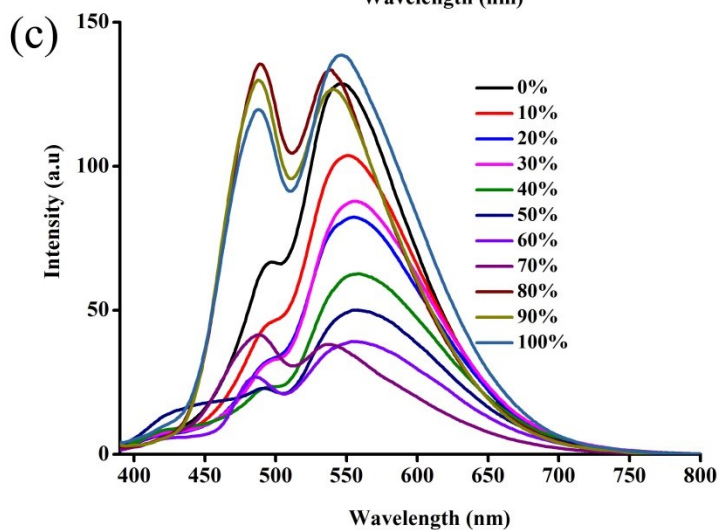

Fig. S5. AEE (a) digital fluorescence images and fluorescence spectra of **1** in (b) day 1 and (c) day 2.

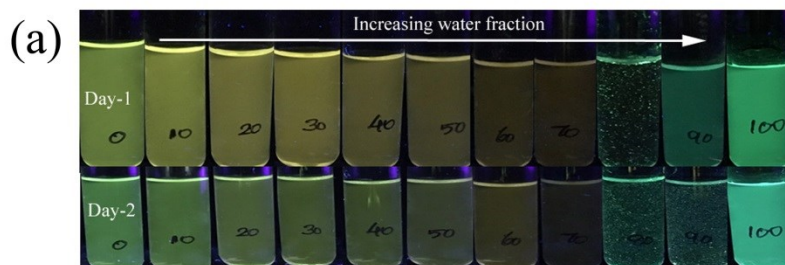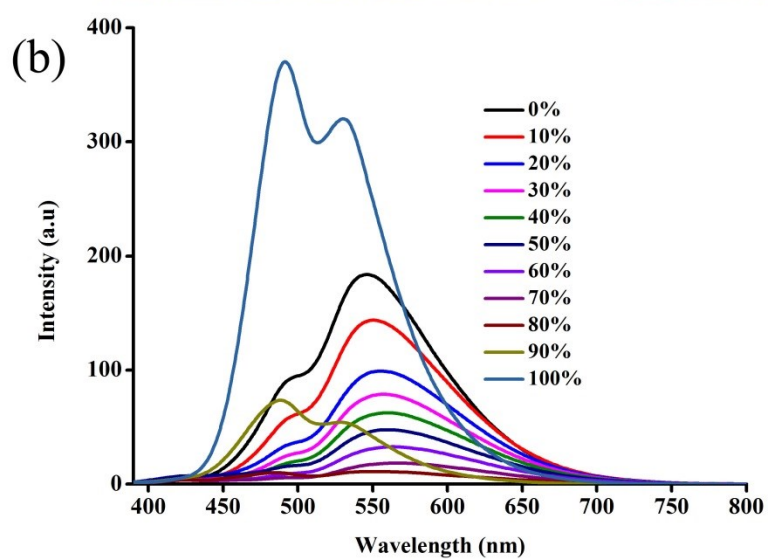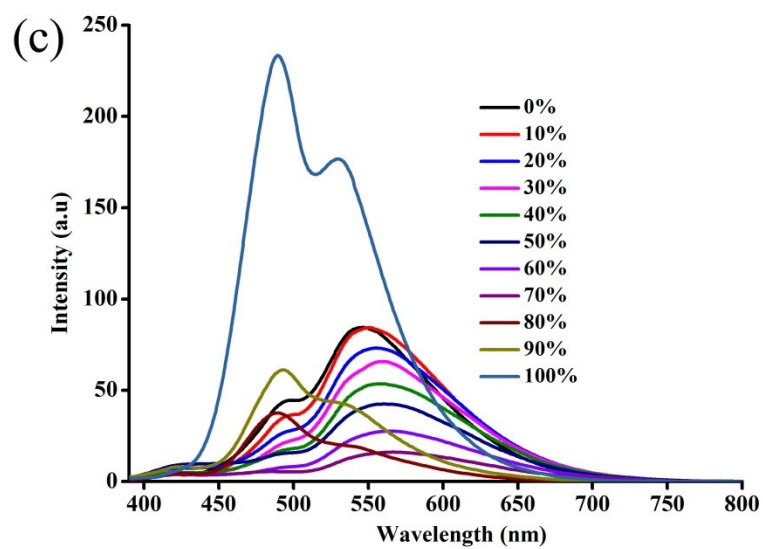

Fig. S6. AEE (a) digital fluorescence images and fluorescence spectra of **2** in (b) day 1 and (c) day 2.

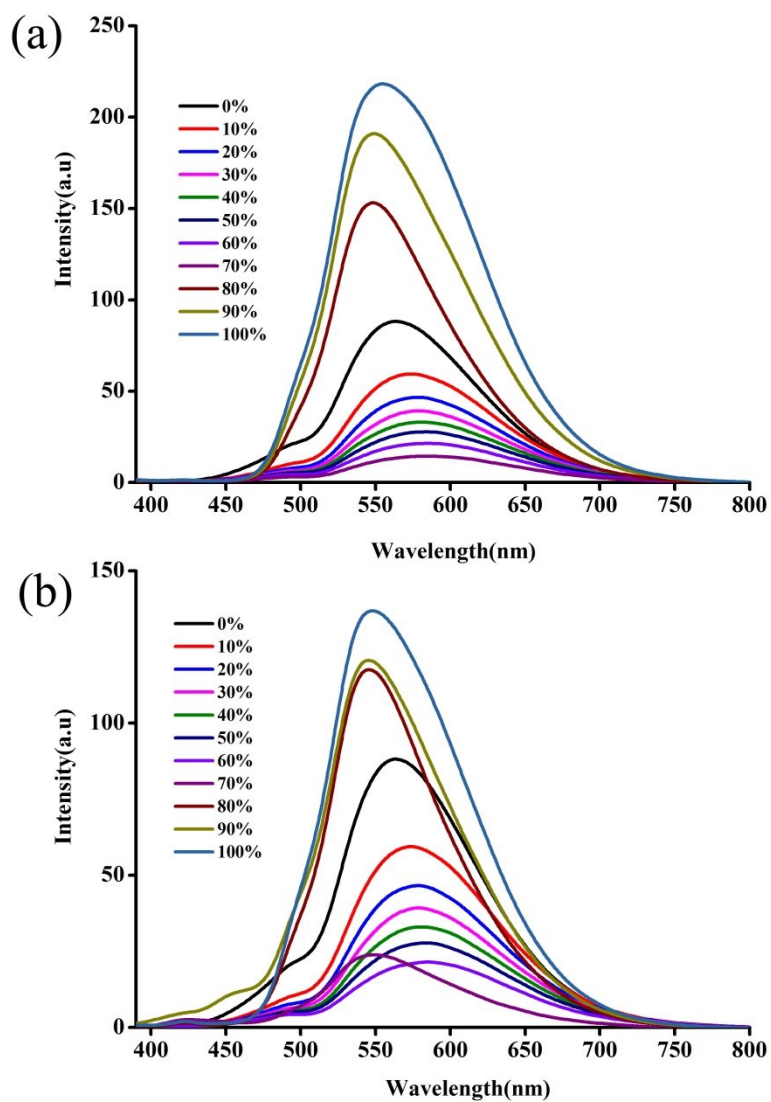

Fig. S7. AEE fluorescence spectra of **4** in (a) day 1 and (b) day 2.

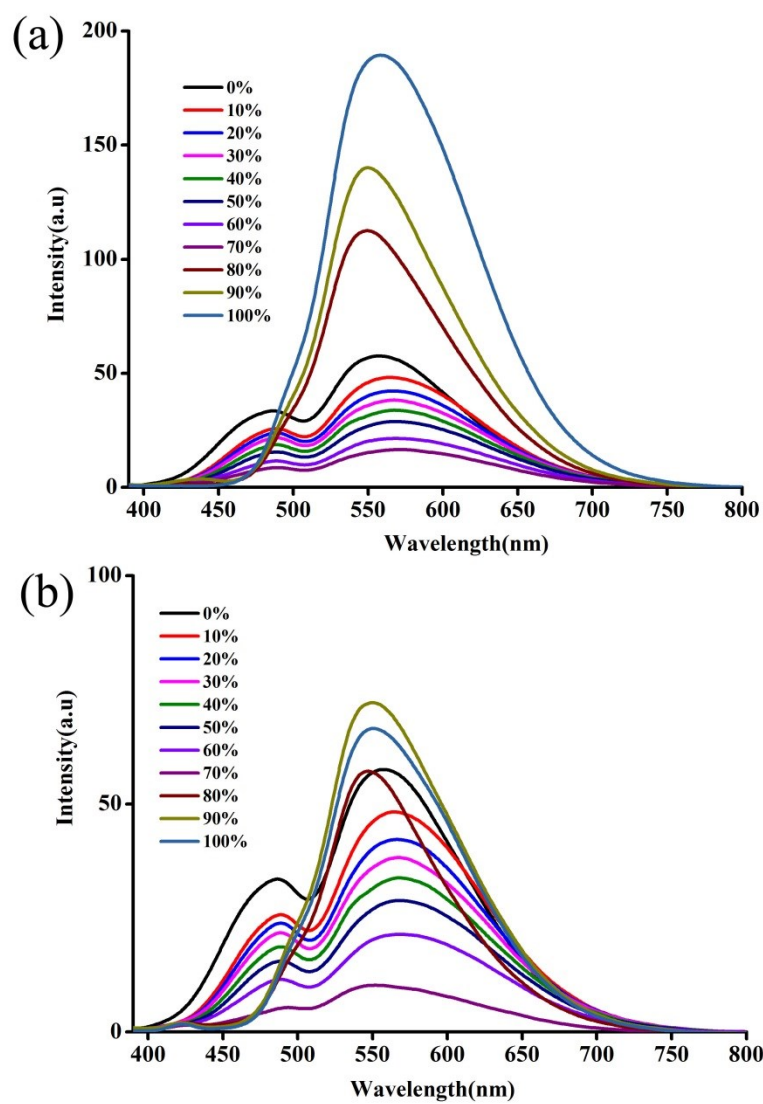

Fig. S8. AEE (a) digital fluorescence images and fluorescence spectra of **5** in (b) day 1 and (c) day 2.

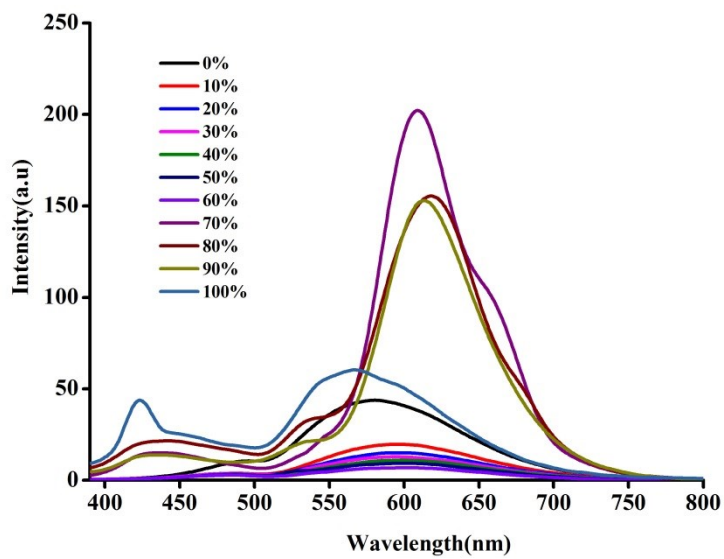

Fig. S9. AEE fluorescence spectra of **6** in day 2.

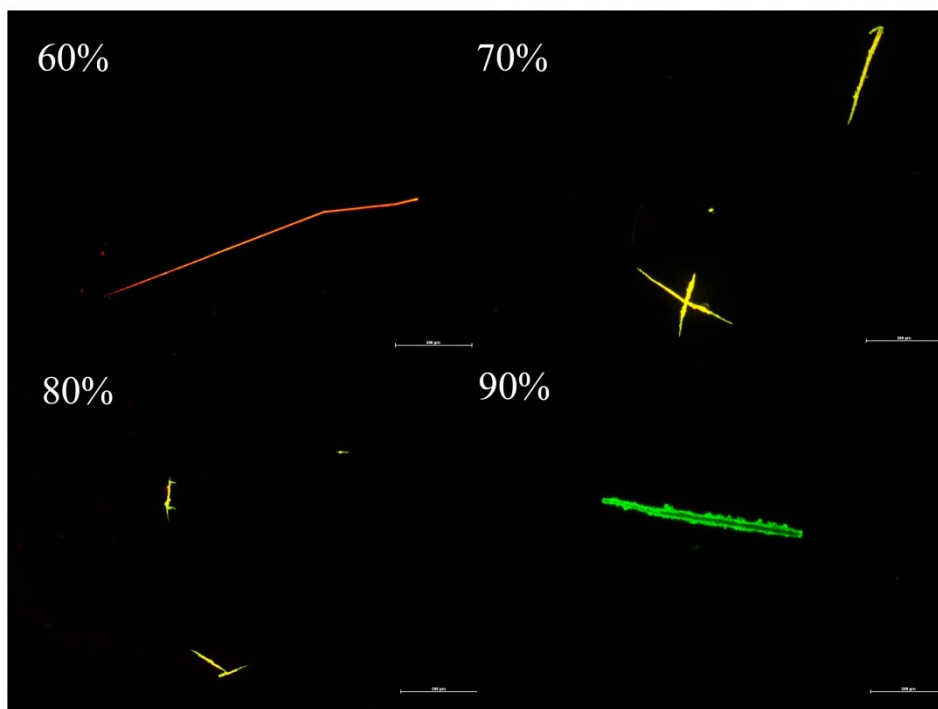

Fig. S10. Fluorescence microscopic images of **1** in different water fraction in CH<sub>3</sub>CN:water mixture in day 2.

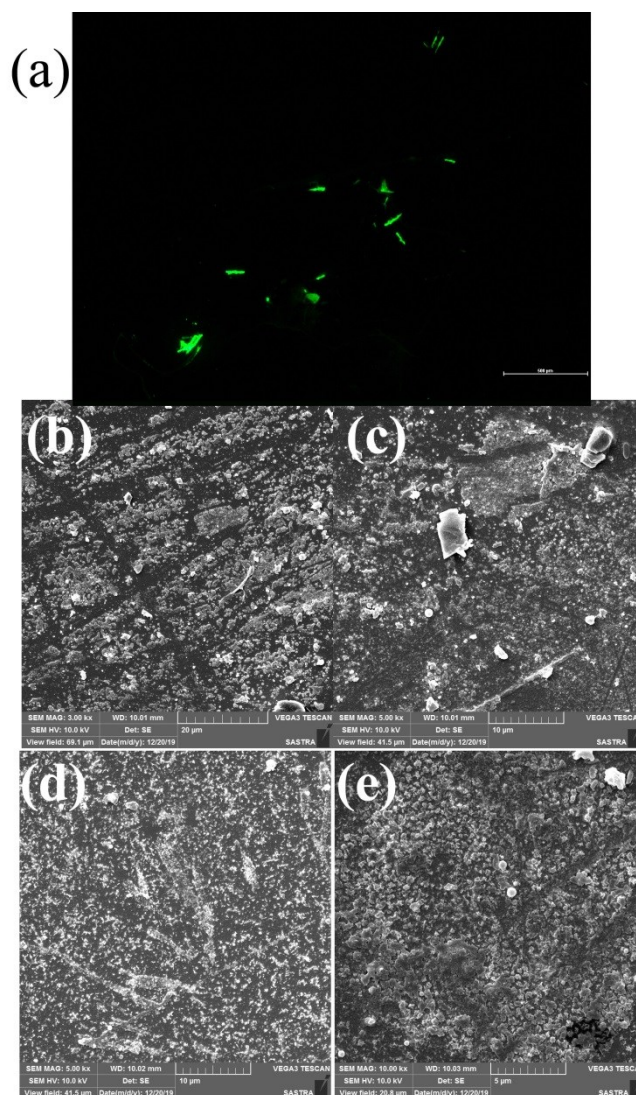

Fig. S11. (a) Fluorescence (100% water) and (b-e) scanning electron microscopic images of **1** in different water fraction in CH<sub>3</sub>CN:water mixture (b, c) 60% and (d, e) 100% in day 2.

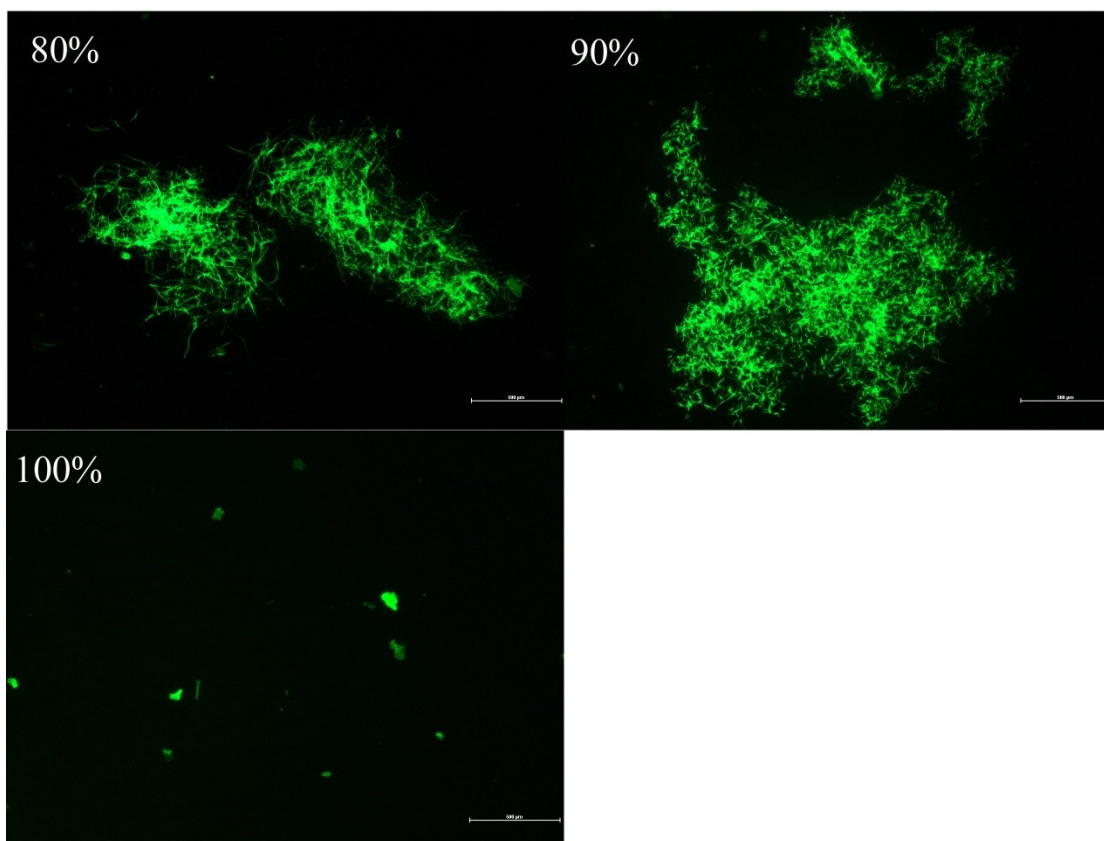

Fig. S12. Fluorescence microscopic images of **2** in different water fraction in CH<sub>3</sub>CN:water mixture in day 2.

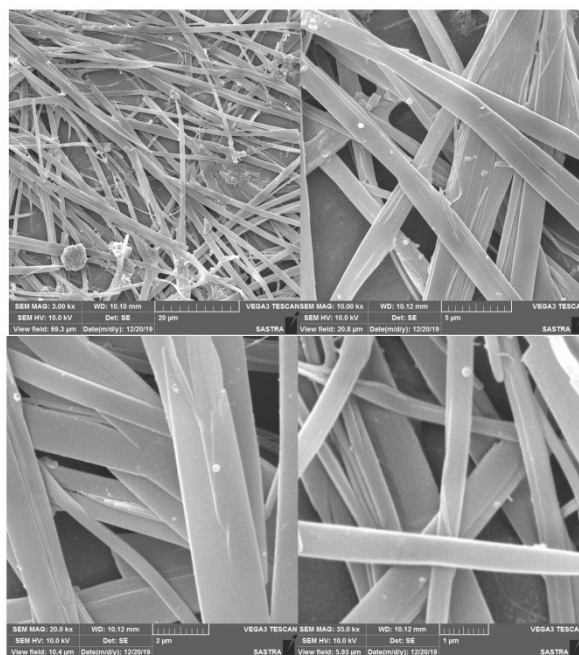

Fig. S13. Scanning electron microscopic images of **2** in 80% water fraction in CH<sub>3</sub>CN:water mixture in day 2.

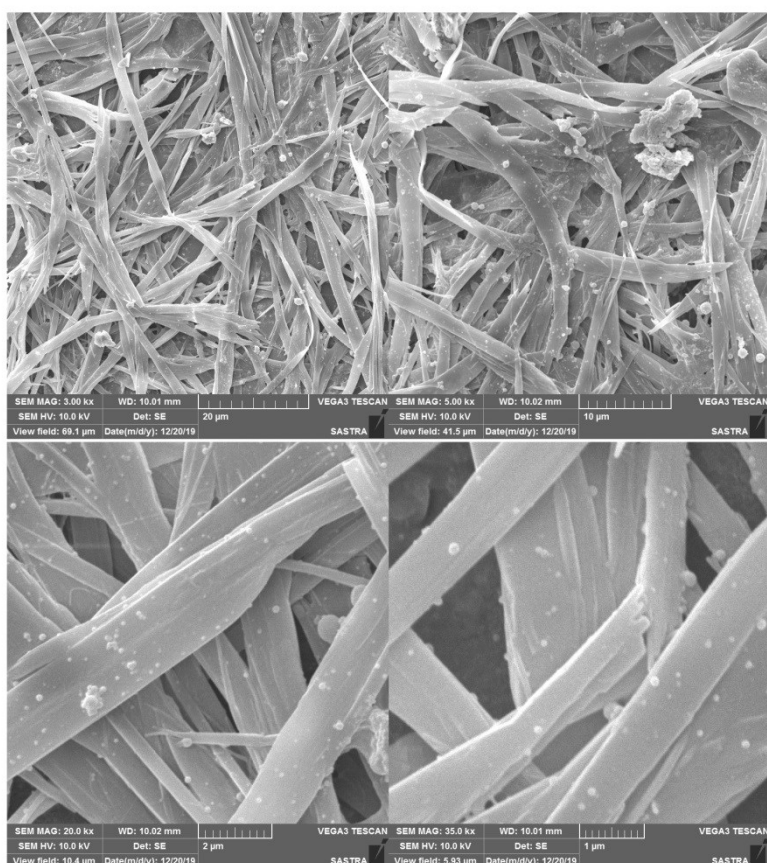

Fig. S14. Scanning electron microscopic images of **2** in 90% water fraction in CH<sub>3</sub>CN:water mixture in day 2.

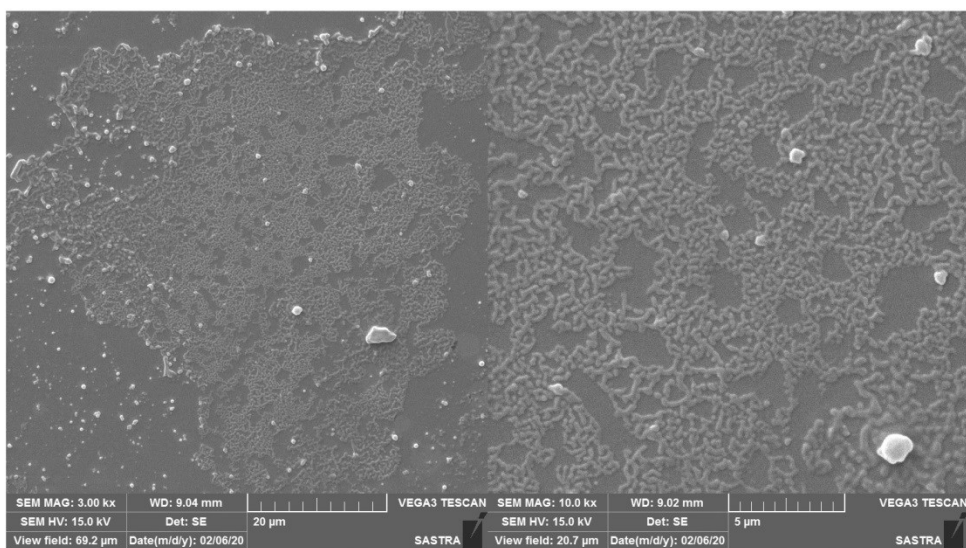

Fig. S15. Scanning electron microscopic images of **2** in 100% water fraction in CH<sub>3</sub>CN:water mixture in day 2.



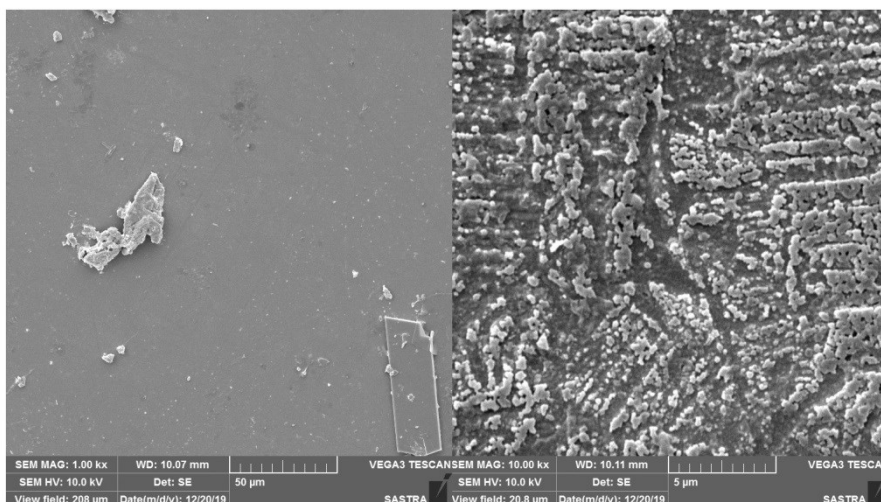

Fig. S16. Scanning electron microscopic images of **3** in 70% water fraction in CH<sub>3</sub>CN:water mixture in day 2.

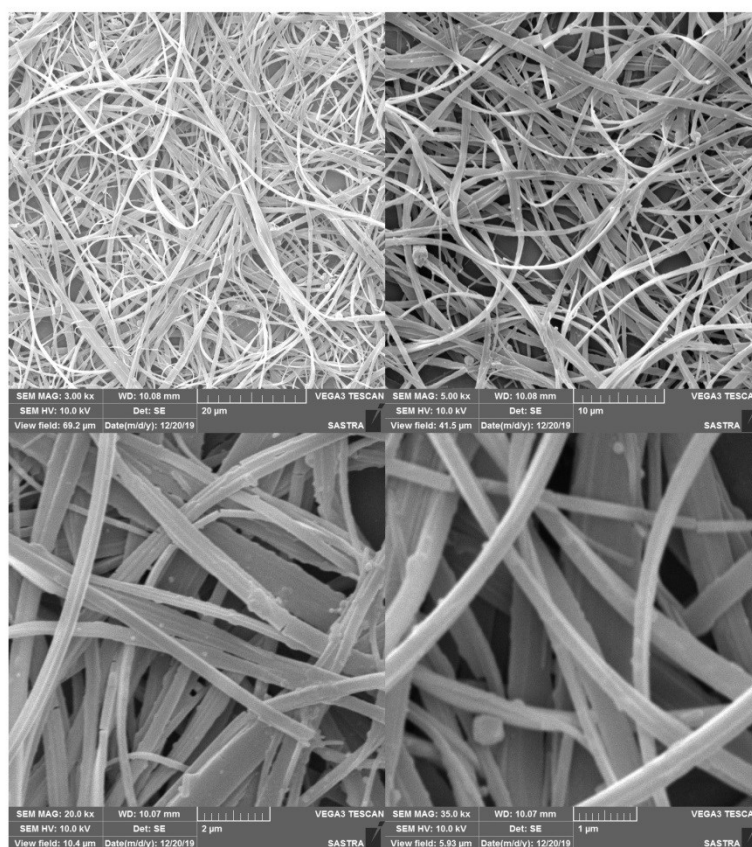

Fig. S17. Scanning electron microscopic images of **3** in 80% water fraction in CH<sub>3</sub>CN:water mixture in day 2.

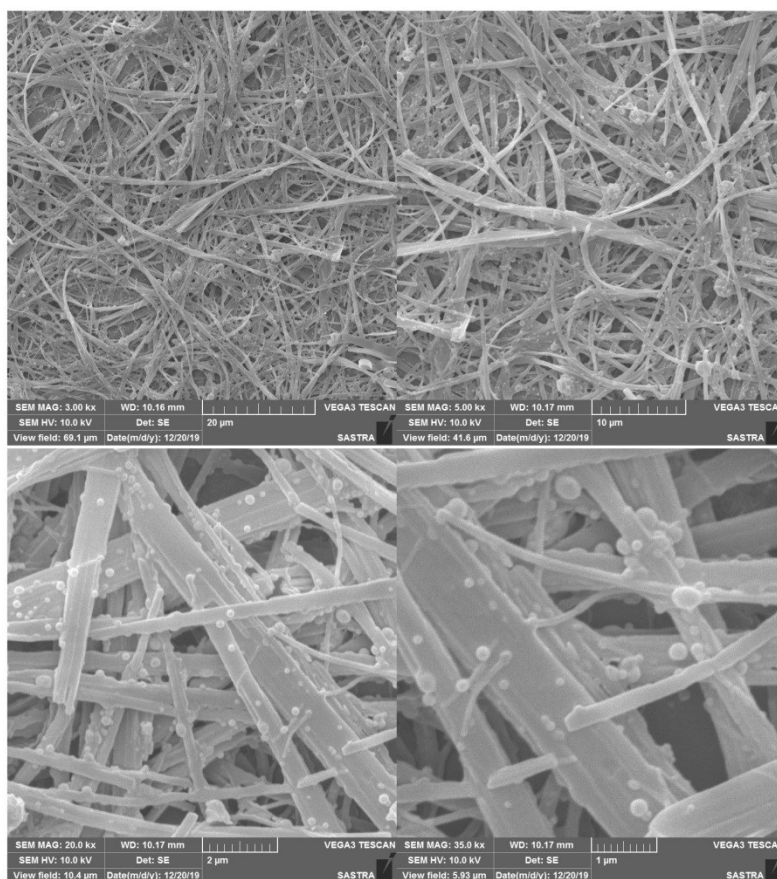

Fig. S18. Scanning electron microscopic images of **3** in 90% water fraction in  $\text{CH}_3\text{CN}$ :water mixture in day 2.

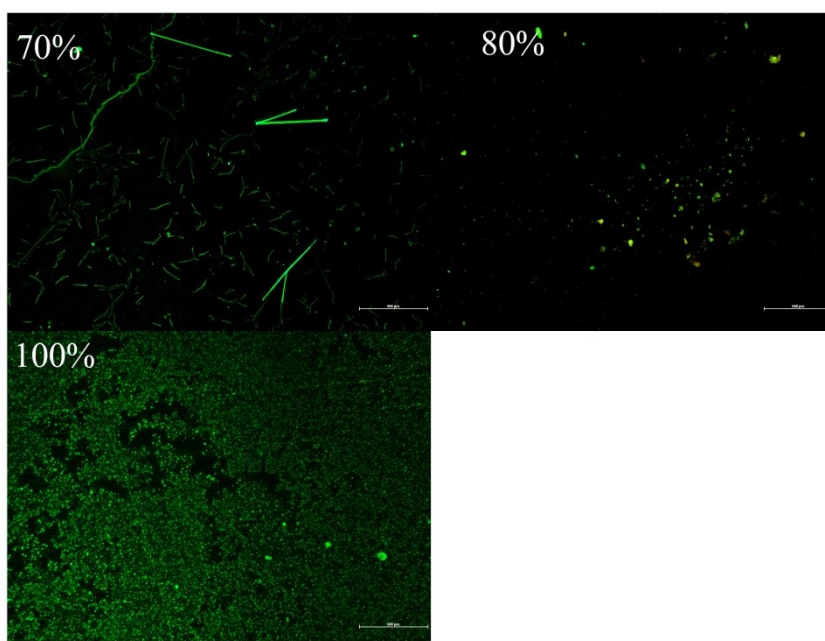

Fig. S19. Fluorescence microscopic images of **4** in different water fraction in  $\text{CH}_3\text{CN}$ :water mixture in day 2.

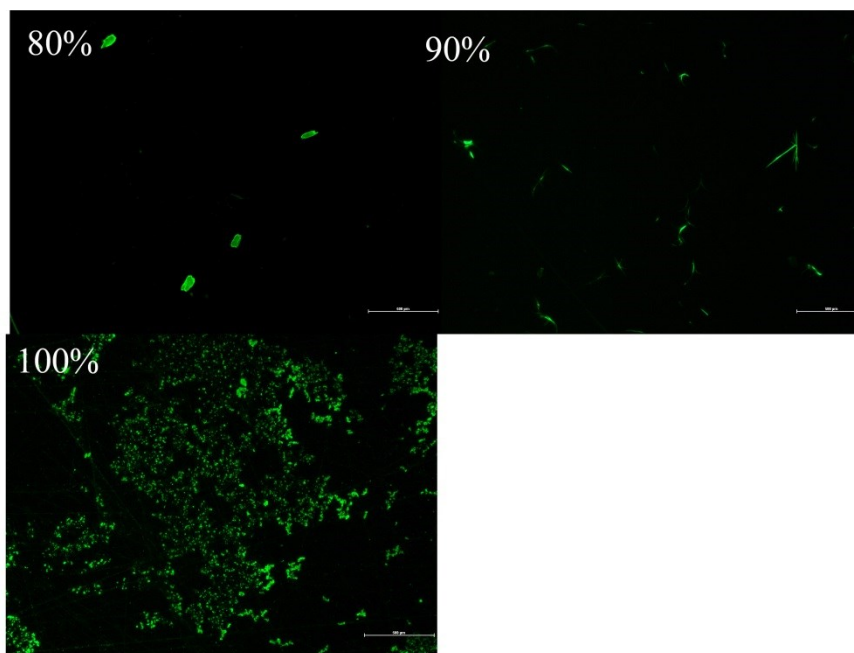

Fig. S20. Fluorescence microscopic images of **5** in different water fraction in CH<sub>3</sub>CN:water mixture in day 2.

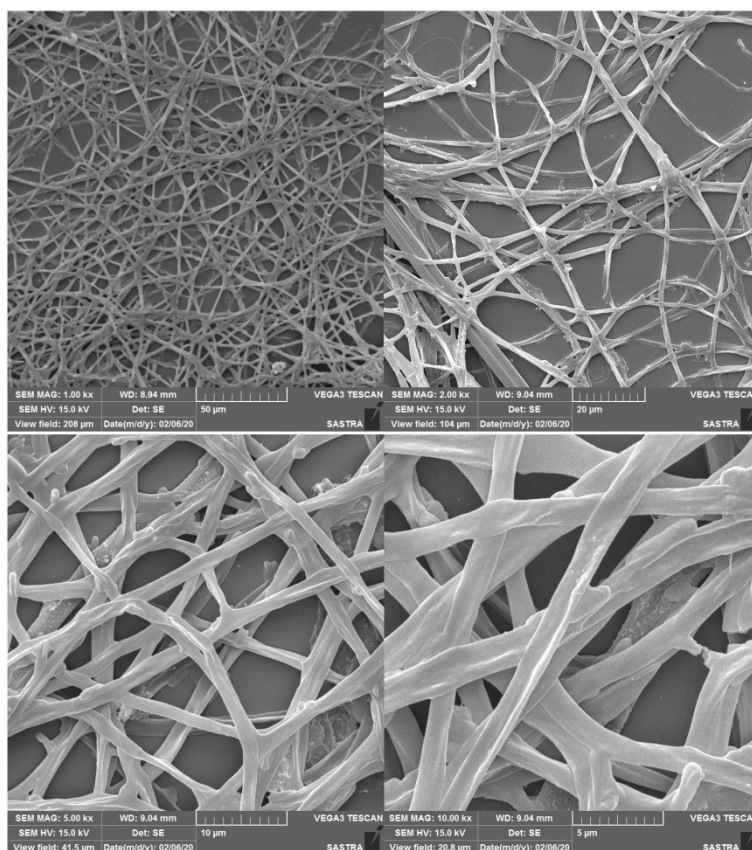

Fig. S21. Scanning electron microscopic images of **4** in 70% water fraction in CH<sub>3</sub>CN:water mixture in day 2.

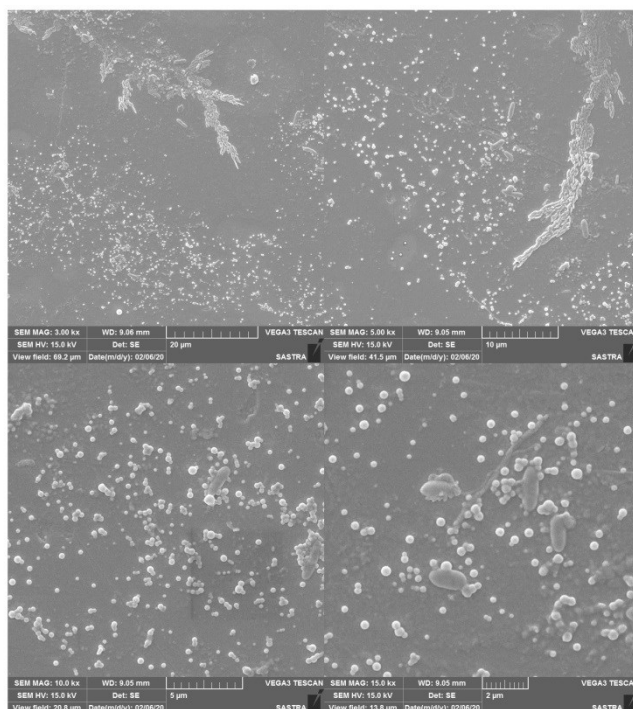

Fig. S22. Scanning electron microscopic images of **4** in 100% water fraction in CH<sub>3</sub>CN:water mixture in day 2.

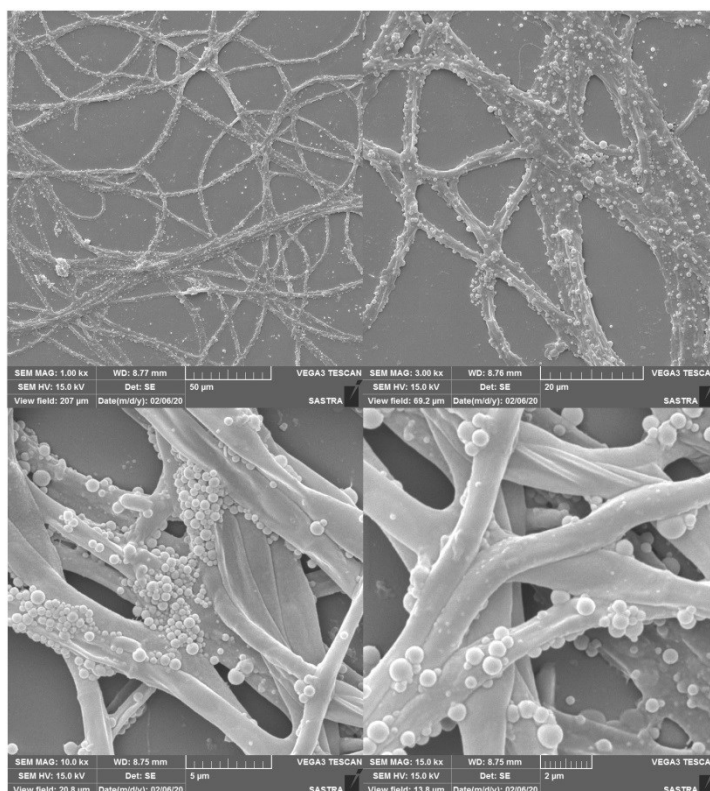

Fig. S23. Scanning electron microscopic images of **5** in 100% water fraction in CH<sub>3</sub>CN:water mixture in day 2.

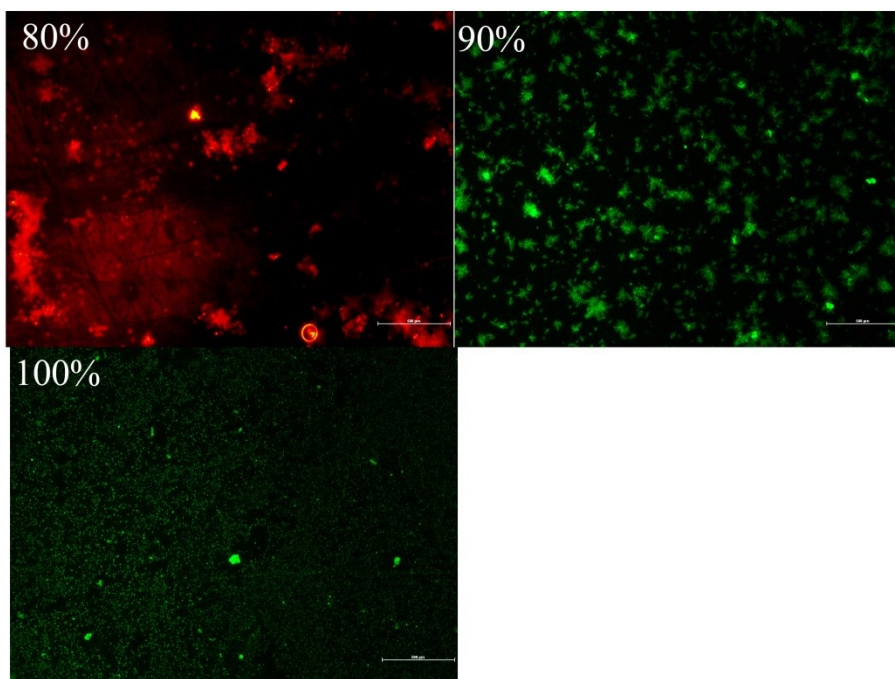

Fig. S24. Fluorescence microscopic images of **6** in different water fraction in CH<sub>3</sub>CN:water mixture in day 2.

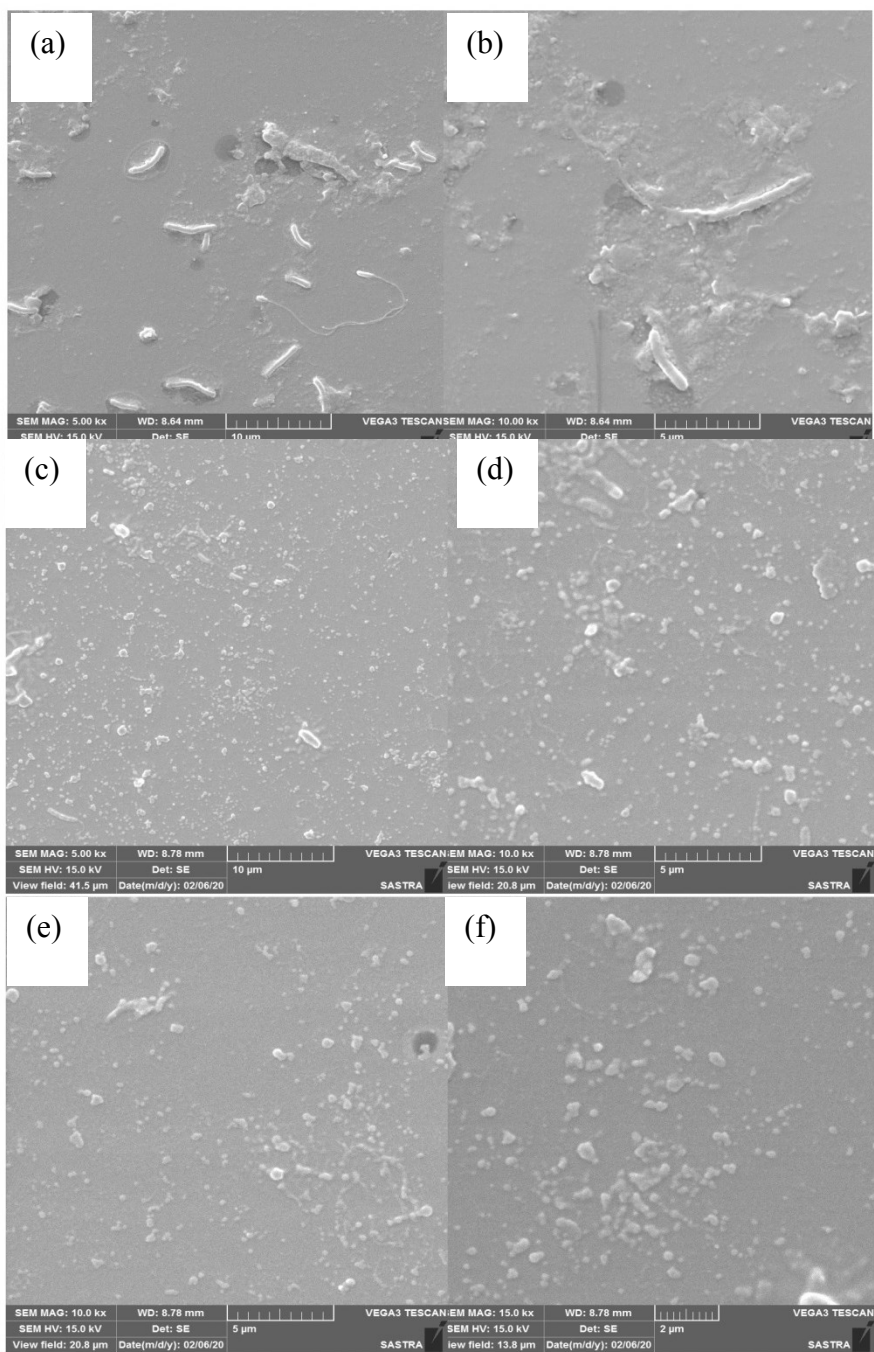

Fig. S25. Scanning electron microscopic images of **6** in (a,b) 80% and (c-f) 100% water fraction in CH<sub>3</sub>CN:water mixture in day 2.

Table S2. Molecular conformational changes observed in the crystal lattices of **1-4** and **6**.

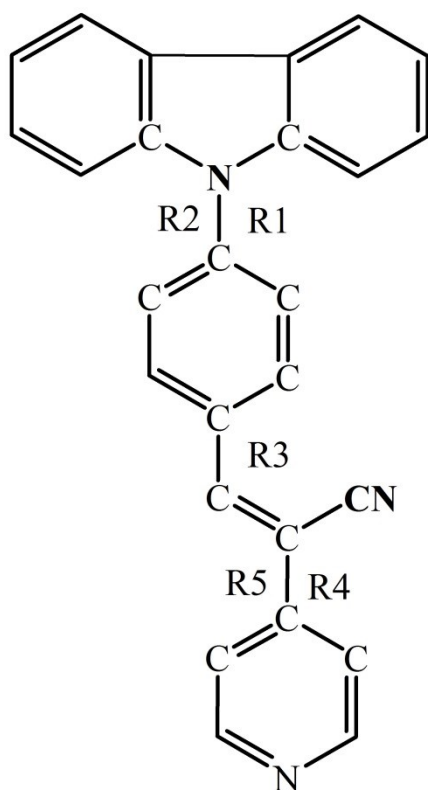

|     | Torsion angle ( $\tau$ ) |              |              |             |             |
|-----|--------------------------|--------------|--------------|-------------|-------------|
|     | R1                       | R2           | R3           | R4          | R5          |
| 1-G | 43.81                    | 46.57        | 18.51        | 0.55        | 1.94        |
| 1-O | 43.98                    | 46.39        | 18.30        | 0.75        | 2.14        |
| 2   | 50.54                    | 53.95        | 19.22        | 6.99        | 8.22        |
| 3-G | 42.45, 44.25             | 48.59, 35.30 | 16.76, 23.25 | 23.46, 4.52 | 8.54, 21.14 |
| 3-Y | 41.93, 43.40             | 48.75, 35.33 | 16.66, 23.75 | 23.50, 4.86 | 7.88, 20.96 |
| 4   | 25.24                    | 35.79        | 3.82         | 8.58        | 6.82        |
| 6   | 32.19                    | 30.25        | 19.61        | 28.78       | 33.95       |

Table S3. Crystal data and structure refinement for **1-G**.

|                                   |                                                |                |
|-----------------------------------|------------------------------------------------|----------------|
| Identification code               | 1-G                                            |                |
| Empirical formula                 | C <sub>26</sub> H <sub>17</sub> N <sub>3</sub> |                |
| Formula weight                    | 371.42                                         |                |
| Temperature                       | 220(2) K                                       |                |
| Wavelength                        | 0.630 Å                                        |                |
| Crystal system                    | Monoclinic                                     |                |
| Space group                       | P2 <sub>1</sub> /c                             |                |
| Unit cell dimensions              | a = 14.957(3) Å                                | α = 90°.       |
|                                   | b = 17.427(4) Å                                | β = 95.41(3)°. |
|                                   | c = 7.1320(14) Å                               | γ = 90°.       |
| Volume                            | 1850.7(6) Å <sup>3</sup>                       |                |
| Z                                 | 4                                              |                |
| Density (calculated)              | 1.333 Mg/m <sup>3</sup>                        |                |
| Absorption coefficient            | 0.063 mm <sup>-1</sup>                         |                |
| F(000)                            | 776                                            |                |
| Crystal size                      | 0.159 x 0.125 x 0.097 mm <sup>3</sup>          |                |
| Theta range for data collection   | 1.212 to 25.498°.                              |                |
| Index ranges                      | -20 ≤ h ≤ 20, -23 ≤ k ≤ 23, -9 ≤ l ≤ 9         |                |
| Reflections collected             | 17634                                          |                |
| Independent reflections           | 4955 [R(int) = 0.0608]                         |                |
| Completeness to theta = 22.210°   | 100.0 %                                        |                |
| Absorption correction             | Empirical                                      |                |
| Max. and min. transmission        | 1.000 and 0.963                                |                |
| Refinement method                 | Full-matrix least-squares on F <sup>2</sup>    |                |
| Data / restraints / parameters    | 4955 / 0 / 262                                 |                |
| Goodness-of-fit on F <sup>2</sup> | 1.123                                          |                |
| Final R indices [I > 2σ(I)]       | R1 = 0.0549, wR2 = 0.1641                      |                |
| R indices (all data)              | R1 = 0.0642, wR2 = 0.1698                      |                |
| Extinction coefficient            | n/a                                            |                |
| Largest diff. peak and hole       | 0.464 and -0.335 e.Å <sup>-3</sup>             |                |



Table S4. Crystal data and structure refinement for **1-O**.

|                                   |                                                |                |
|-----------------------------------|------------------------------------------------|----------------|
| Identification code               | 1-O                                            |                |
| Empirical formula                 | C <sub>26</sub> H <sub>17</sub> N <sub>3</sub> |                |
| Formula weight                    | 371.42                                         |                |
| Temperature                       | 220(2) K                                       |                |
| Wavelength                        | 0.630 Å                                        |                |
| Crystal system                    | Monoclinic                                     |                |
| Space group                       | P2 <sub>1</sub> /c                             |                |
| Unit cell dimensions              | a = 14.955(3) Å                                | α = 90°.       |
|                                   | b = 17.421(4) Å                                | β = 95.38(3)°. |
|                                   | c = 7.1320(14) Å                               | γ = 90°.       |
| Volume                            | 1849.9(6) Å <sup>3</sup>                       |                |
| Z                                 | 4                                              |                |
| Density (calculated)              | 1.334 Mg/m <sup>3</sup>                        |                |
| Absorption coefficient            | 0.063 mm <sup>-1</sup>                         |                |
| F(000)                            | 776                                            |                |
| Crystal size                      | 0.105 x 0.094 x 0.074 mm <sup>3</sup>          |                |
| Theta range for data collection   | 1.212 to 25.497°.                              |                |
| Index ranges                      | -20 ≤ h ≤ 20, -23 ≤ k ≤ 23, -9 ≤ l ≤ 9         |                |
| Reflections collected             | 17419                                          |                |
| Independent reflections           | 4953 [R(int) = 0.0630]                         |                |
| Completeness to theta = 22.210°   | 100.0 %                                        |                |
| Absorption correction             | Empirical                                      |                |
| Max. and min. transmission        | 1.000 and 0.961                                |                |
| Refinement method                 | Full-matrix least-squares on F <sup>2</sup>    |                |
| Data / restraints / parameters    | 4953 / 0 / 262                                 |                |
| Goodness-of-fit on F <sup>2</sup> | 1.039                                          |                |
| Final R indices [I > 2σ(I)]       | R1 = 0.0512, wR2 = 0.1398                      |                |
| R indices (all data)              | R1 = 0.0646, wR2 = 0.1462                      |                |
| Extinction coefficient            | n/a                                            |                |
| Largest diff. peak and hole       | 0.346 and -0.352 e.Å <sup>-3</sup>             |                |

Table S5. Crystal data and structure refinement for **2**.

|                                   |                                                |          |
|-----------------------------------|------------------------------------------------|----------|
| Identification code               | <b>2</b>                                       |          |
| Empirical formula                 | C <sub>26</sub> H <sub>17</sub> N <sub>3</sub> |          |
| Formula weight                    | 371.42                                         |          |
| Temperature                       | 220(2) K                                       |          |
| Wavelength                        | 0.610 Å                                        |          |
| Crystal system                    | Orthorhombic                                   |          |
| Space group                       | <i>Pna2</i> <sub>1</sub>                       |          |
| Unit cell dimensions              | a = 21.773(4) Å                                | α = 90°. |
|                                   | b = 6.9330(14) Å                               | β = 90°. |
|                                   | c = 12.578(3) Å                                | γ = 90°. |
| Volume                            | 1898.7(7) Å <sup>3</sup>                       |          |
| Z                                 | 4                                              |          |
| Density (calculated)              | 1.299 Mg/m <sup>3</sup>                        |          |
| Absorption coefficient            | 0.058 mm <sup>-1</sup>                         |          |
| F(000)                            | 776                                            |          |
| Crystal size                      | 0.065 x 0.027 x 0.012 mm <sup>3</sup>          |          |
| Theta range for data collection   | 1.605 to 24.996°.                              |          |
| Index ranges                      | -30 ≤ h ≤ 30, -9 ≤ k ≤ 9, -17 ≤ l ≤ 17         |          |
| Reflections collected             | 18632                                          |          |
| Independent reflections           | 5280 [R(int) = 0.0862]                         |          |
| Completeness to theta = 21.469°   | 100.0 %                                        |          |
| Absorption correction             | Empirical                                      |          |
| Max. and min. transmission        | 1.000 and 0.829                                |          |
| Refinement method                 | Full-matrix least-squares on F <sup>2</sup>    |          |
| Data / restraints / parameters    | 5280 / 1 / 263                                 |          |
| Goodness-of-fit on F <sup>2</sup> | 0.927                                          |          |
| Final R indices [I > 2σ(I)]       | R1 = 0.0573, wR2 = 0.1388                      |          |
| R indices (all data)              | R1 = 0.0924, wR2 = 0.1551                      |          |
| Absolute structure parameter      | 1(6)                                           |          |
| Extinction coefficient            | n/a                                            |          |
| Largest diff. peak and hole       | 0.316 and -0.195 e.Å <sup>-3</sup>             |          |

Table S6. Crystal data and structure refinement for **3-G**.

|                                   |                                                |                 |
|-----------------------------------|------------------------------------------------|-----------------|
| Identification code               | 3-G                                            |                 |
| Empirical formula                 | C <sub>26</sub> H <sub>17</sub> N <sub>3</sub> |                 |
| Formula weight                    | 371.42                                         |                 |
| Temperature                       | 220(2) K                                       |                 |
| Wavelength                        | 0.630 Å                                        |                 |
| Crystal system                    | Monoclinic                                     |                 |
| Space group                       | P2 <sub>1</sub> /n                             |                 |
| Unit cell dimensions              | a = 17.613(4) Å                                | α = 90°.        |
|                                   | b = 7.8670(16) Å                               | β = 102.53(3)°. |
|                                   | c = 27.784(6) Å                                | γ = 90°.        |
| Volume                            | 3758.1(14) Å <sup>3</sup>                      |                 |
| Z                                 | 8                                              |                 |
| Density (calculated)              | 1.313 Mg/m <sup>3</sup>                        |                 |
| Absorption coefficient            | 0.062 mm <sup>-1</sup>                         |                 |
| F(000)                            | 1552                                           |                 |
| Crystal size                      | 0.073 x 0.068 x 0.009 mm <sup>3</sup>          |                 |
| Theta range for data collection   | 1.331 to 25.499°.                              |                 |
| Index ranges                      | -24 ≤ h ≤ 24, -10 ≤ k ≤ 10, -37 ≤ l ≤ 37       |                 |
| Reflections collected             | 35185                                          |                 |
| Independent reflections           | 10047 [R(int) = 0.1256]                        |                 |
| Completeness to theta = 22.210°   | 100.0 %                                        |                 |
| Absorption correction             | Empirical                                      |                 |
| Max. and min. transmission        | 1.000 and 0.964                                |                 |
| Refinement method                 | Full-matrix least-squares on F <sup>2</sup>    |                 |
| Data / restraints / parameters    | 10047 / 0 / 523                                |                 |
| Goodness-of-fit on F <sup>2</sup> | 0.798                                          |                 |
| Final R indices [I > 2σ(I)]       | R1 = 0.0586, wR2 = 0.1190                      |                 |
| R indices (all data)              | R1 = 0.1478, wR2 = 0.1410                      |                 |
| Extinction coefficient            | n/a                                            |                 |
| Largest diff. peak and hole       | 0.210 and -0.290 e.Å <sup>-3</sup>             |                 |

Table S7. Crystal data and structure refinement for **3-Y**.

|                                   |                                                |                 |
|-----------------------------------|------------------------------------------------|-----------------|
| Identification code               | 3-Y                                            |                 |
| Empirical formula                 | C <sub>52</sub> H <sub>34</sub> N <sub>6</sub> |                 |
| Formula weight                    | 742.85                                         |                 |
| Temperature                       | 220(2) K                                       |                 |
| Wavelength                        | 0.610 Å                                        |                 |
| Crystal system                    | Monoclinic                                     |                 |
| Space group                       | P2 <sub>1</sub> /n                             |                 |
| Unit cell dimensions              | a = 17.595(4) Å                                | α = 90°.        |
|                                   | b = 7.8670(16) Å                               | β = 102.57(3)°. |
|                                   | c = 27.780(6) Å                                | γ = 90°.        |
| Volume                            | 3753.1(14) Å <sup>3</sup>                      |                 |
| Z                                 | 4                                              |                 |
| Density (calculated)              | 1.315 Mg/m <sup>3</sup>                        |                 |
| Absorption coefficient            | 0.058 mm <sup>-1</sup>                         |                 |
| F(000)                            | 1552                                           |                 |
| Crystal size                      | 0.064 x 0.031 x 0.009 mm <sup>3</sup>          |                 |
| Theta range for data collection   | 1.289 to 25.000°.                              |                 |
| Index ranges                      | -24 ≤ h ≤ 24, -10 ≤ k ≤ 10, -38 ≤ l ≤ 38       |                 |
| Reflections collected             | 37387                                          |                 |
| Independent reflections           | 10399 [R(int) = 0.1493]                        |                 |
| Completeness to theta = 21.469°   | 99.8 %                                         |                 |
| Absorption correction             | Empirical                                      |                 |
| Max. and min. transmission        | 1.000 and 0.746                                |                 |
| Refinement method                 | Full-matrix least-squares on F <sup>2</sup>    |                 |
| Data / restraints / parameters    | 10399 / 12 / 524                               |                 |
| Goodness-of-fit on F <sup>2</sup> | 0.791                                          |                 |
| Final R indices [I > 2σ(I)]       | R1 = 0.0580, wR2 = 0.1217                      |                 |
| R indices (all data)              | R1 = 0.1789, wR2 = 0.1550                      |                 |
| Extinction coefficient            | 0.0095(8)                                      |                 |
| Largest diff. peak and hole       | 0.234 and -0.200 e.Å <sup>-3</sup>             |                 |

Table S8. Crystal data and structure refinement for **4**.

|                                   |                                                |          |
|-----------------------------------|------------------------------------------------|----------|
| Identification code               | 4                                              |          |
| Empirical formula                 | C <sub>26</sub> H <sub>19</sub> N <sub>3</sub> |          |
| Formula weight                    | 373.44                                         |          |
| Temperature                       | 220(2) K                                       |          |
| Wavelength                        | 0.650 Å                                        |          |
| Crystal system                    | Orthorhombic                                   |          |
| Space group                       | Pca2 <sub>1</sub>                              |          |
| Unit cell dimensions              | a = 27.195(5) Å                                | α = 90°. |
|                                   | b = 7.8540(16) Å                               | β = 90°. |
|                                   | c = 9.4070(19) Å                               | γ = 90°. |
| Volume                            | 2009.2(7) Å <sup>3</sup>                       |          |
| Z                                 | 4                                              |          |
| Density (calculated)              | 1.235 Mg/m <sup>3</sup>                        |          |
| Absorption coefficient            | 0.061 mm <sup>-1</sup>                         |          |
| F(000)                            | 784                                            |          |
| Crystal size                      | 0.065 x 0.059 x 0.043 mm <sup>3</sup>          |          |
| Theta range for data collection   | 2.372 to 25.999°.                              |          |
| Index ranges                      | -36 ≤ h ≤ 36, -10 ≤ k ≤ 10, -11 ≤ l ≤ 11       |          |
| Reflections collected             | 18147                                          |          |
| Independent reflections           | 4952 [R(int) = 0.0564]                         |          |
| Completeness to theta = 22.955°   | 97.2 %                                         |          |
| Absorption correction             | Empirical                                      |          |
| Max. and min. transmission        | 1.000 and 0.897                                |          |
| Refinement method                 | Full-matrix least-squares on F <sup>2</sup>    |          |
| Data / restraints / parameters    | 4952 / 7 / 263                                 |          |
| Goodness-of-fit on F <sup>2</sup> | 1.076                                          |          |
| Final R indices [I > 2σ(I)]       | R1 = 0.0434, wR2 = 0.1149                      |          |
| R indices (all data)              | R1 = 0.0478, wR2 = 0.1174                      |          |
| Absolute structure parameter      | 0(4)                                           |          |
| Extinction coefficient            | n/a                                            |          |
| Largest diff. peak and hole       | 0.236 and -0.202 e.Å <sup>-3</sup>             |          |

Table S9. Crystal data and structure refinement for **6**.

|                                   |                                                |          |
|-----------------------------------|------------------------------------------------|----------|
| Identification code               | 6                                              |          |
| Empirical formula                 | C <sub>26</sub> H <sub>19</sub> N <sub>3</sub> |          |
| Formula weight                    | 373.44                                         |          |
| Temperature                       | 220(2) K                                       |          |
| Wavelength                        | 0.610 Å                                        |          |
| Crystal system                    | Orthorhombic                                   |          |
| Space group                       | <i>Pbcn</i>                                    |          |
| Unit cell dimensions              | a = 24.522(5) Å                                | α = 90°. |
|                                   | b = 10.288(2) Å                                | β = 90°. |
|                                   | c = 15.547(3) Å                                | γ = 90°. |
| Volume                            | 3922.2(14) Å <sup>3</sup>                      |          |
| Z                                 | 8                                              |          |
| Density (calculated)              | 1.265 Mg/m <sup>3</sup>                        |          |
| Absorption coefficient            | 0.056 mm <sup>-1</sup>                         |          |
| F(000)                            | 1568                                           |          |
| Crystal size                      | 0.107 x 0.099 x 0.043 mm <sup>3</sup>          |          |
| Theta range for data collection   | 1.842 to 25.000°.                              |          |
| Index ranges                      | -33 ≤ h ≤ 33, -14 ≤ k ≤ 14, -21 ≤ l ≤ 21       |          |
| Reflections collected             | 37251                                          |          |
| Independent reflections           | 5442 [R(int) = 0.0691]                         |          |
| Completeness to theta = 21.469°   | 99.8 %                                         |          |
| Absorption correction             | Empirical                                      |          |
| Max. and min. transmission        | 1.000 and 0.971                                |          |
| Refinement method                 | Full-matrix least-squares on F <sup>2</sup>    |          |
| Data / restraints / parameters    | 5442 / 0 / 262                                 |          |
| Goodness-of-fit on F <sup>2</sup> | 1.119                                          |          |
| Final R indices [I > 2σ(I)]       | R1 = 0.0586, wR2 = 0.1722                      |          |
| R indices (all data)              | R1 = 0.0724, wR2 = 0.1796                      |          |
| Extinction coefficient            | n/a                                            |          |
| Largest diff. peak and hole       | 0.464 and -0.355 e.Å <sup>-3</sup>             |          |

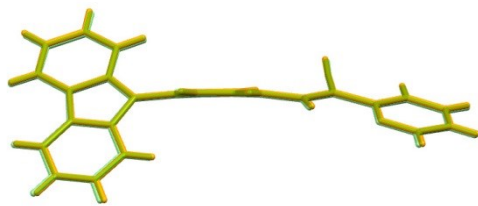

Fig. S26. Superimposed molecular conformaiton of **1-G** and **1-O** polymorphs.

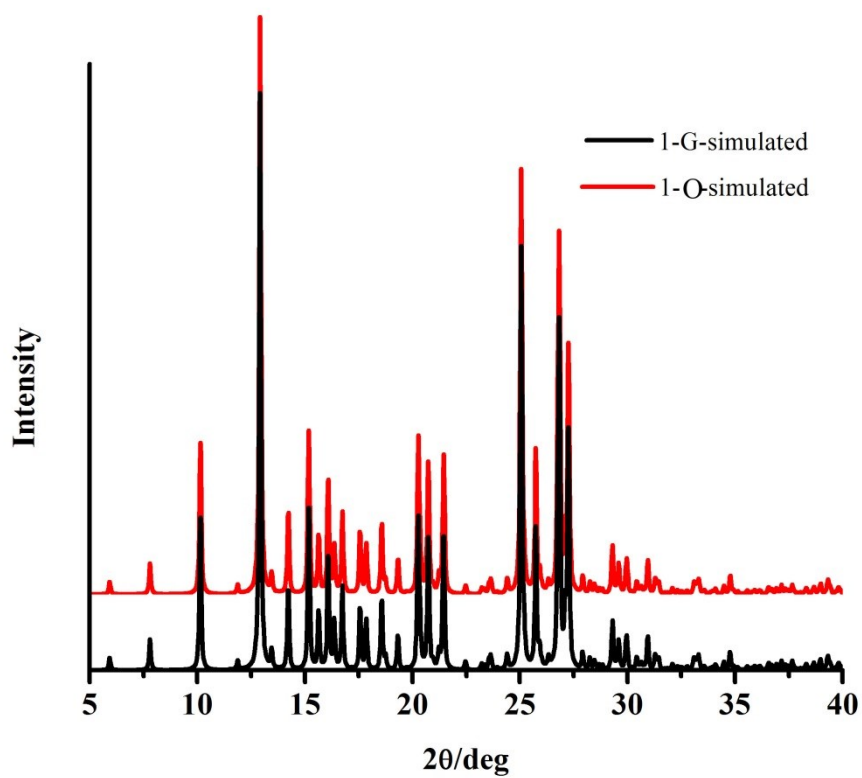

Fig. S27. Simulated PXRD pattern of **1-G** and **1-O**.

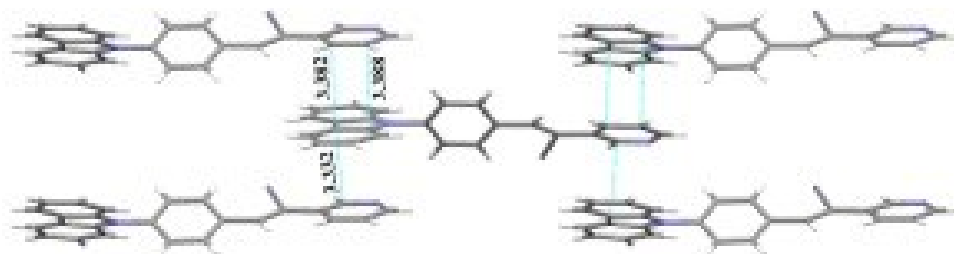

Fig. S28. Intermolecular interactions in the crystal lattice of **2**.

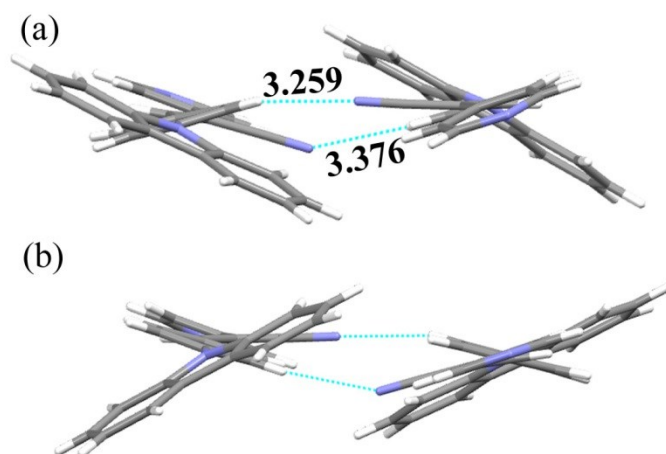

Fig. S29. Comparison of dimer formation in the crystal lattice of (a) **3-G** and (b) **3-Y**.

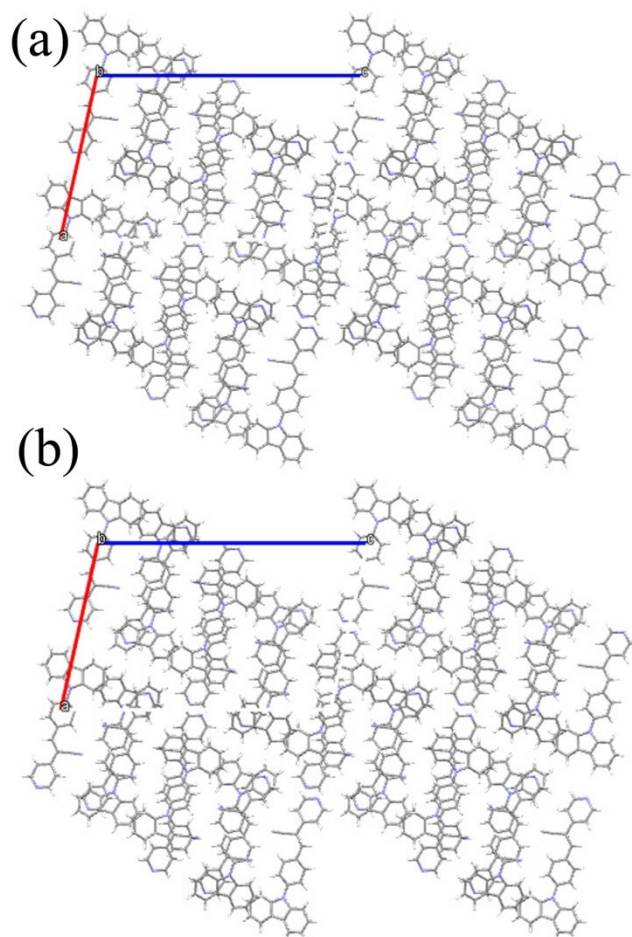

Fig. S30. Molecular packing in the crystal lattice of (a) **3-G** and (b) **3-Y**.



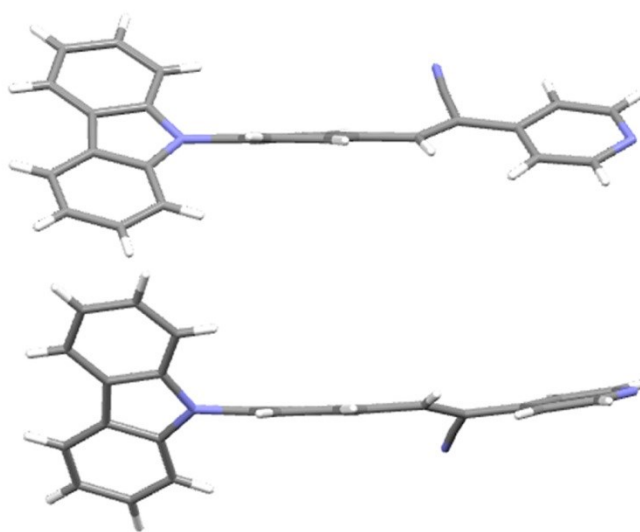

Fig. S31. Molecular conformation of molecules occupied in the asymmetric of (a) **3-G/3-Y**.

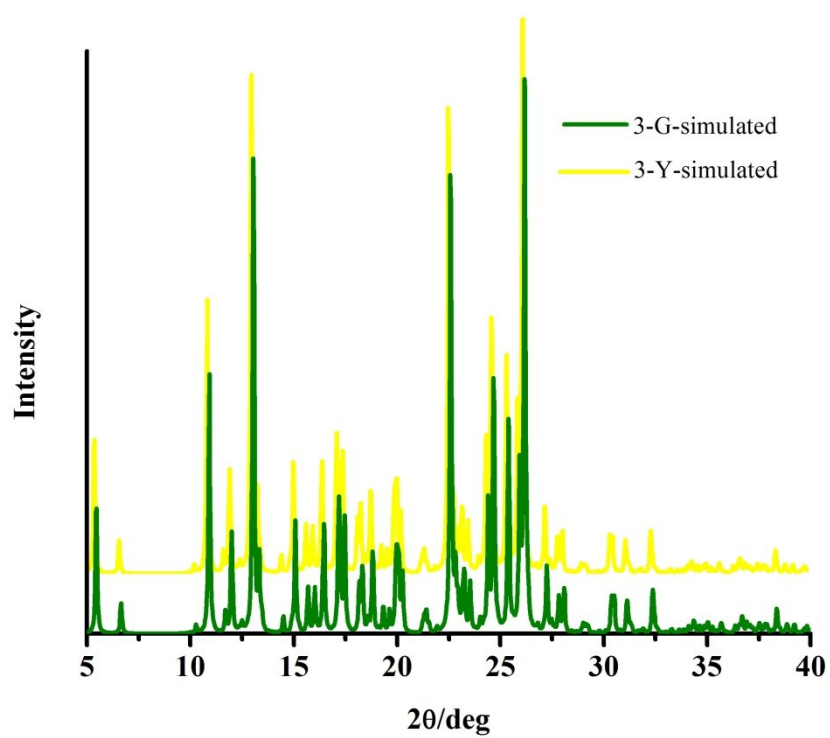

Fig. S32. Simulated PXRD pattern of **3-G** and **3-Y**.

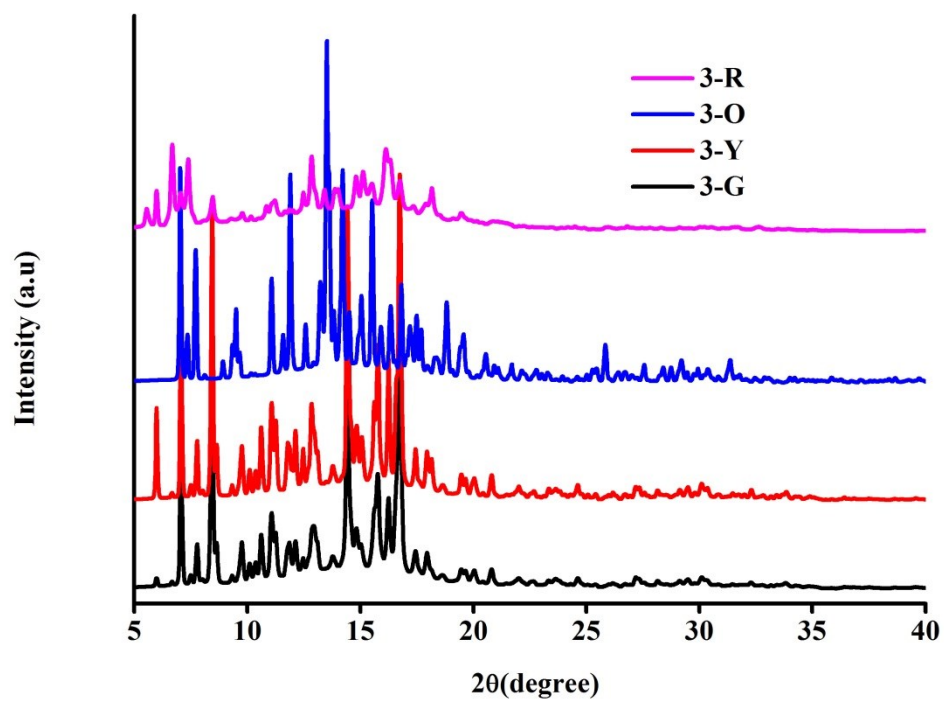

Fig. S33. PXRD pattern of 3-G, 3-Y, 3-O and 3-R.

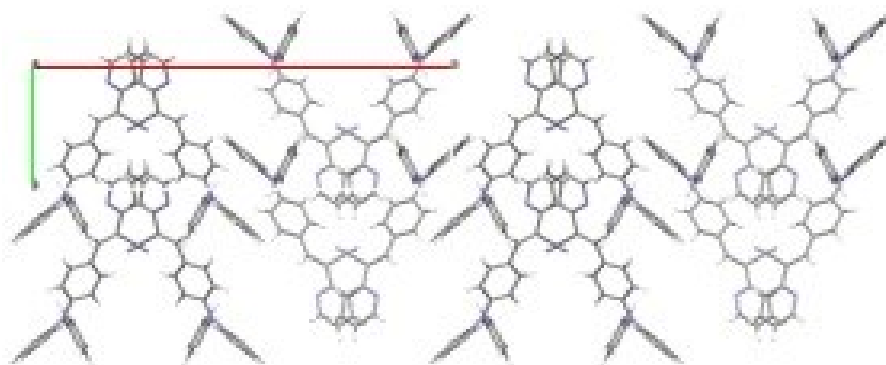

Fig. S34. Molecular packing in the crystal lattice of 4.

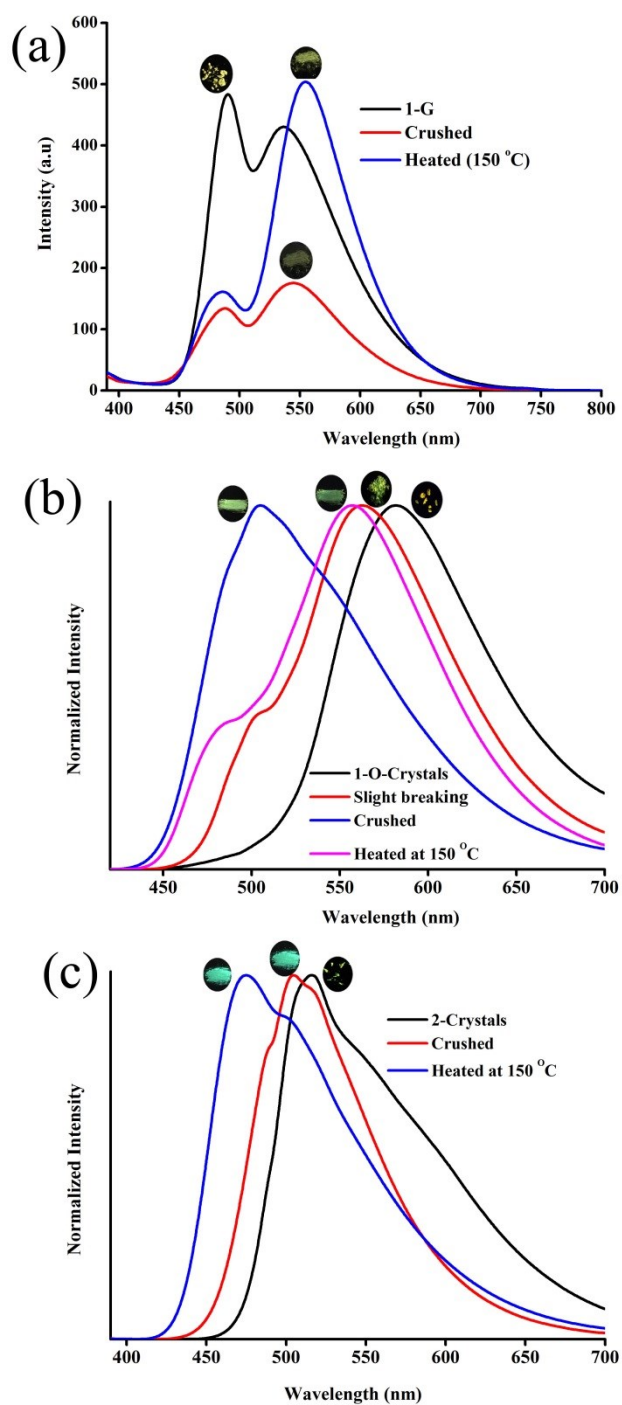

Fig. S35. MFC of 1-G, 1-O and 2.

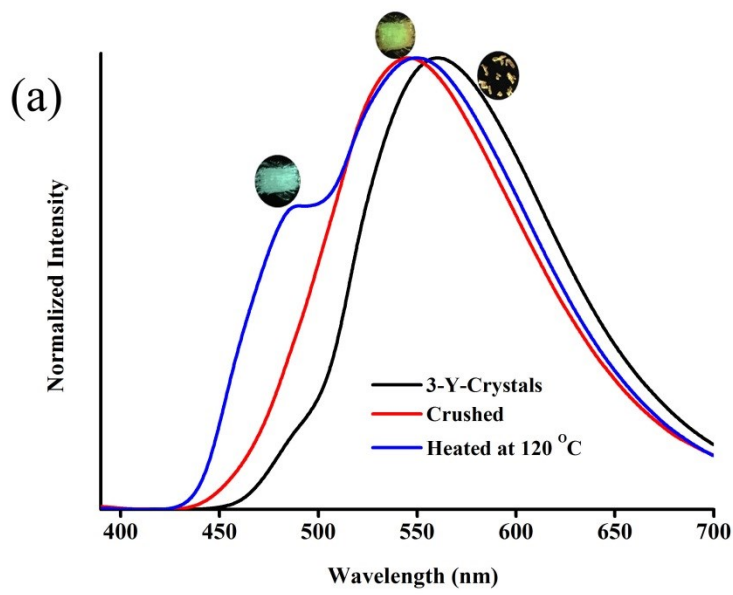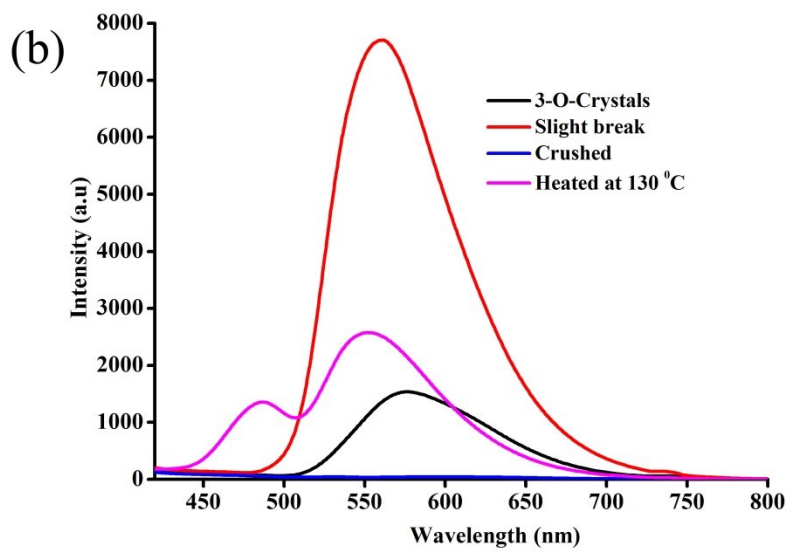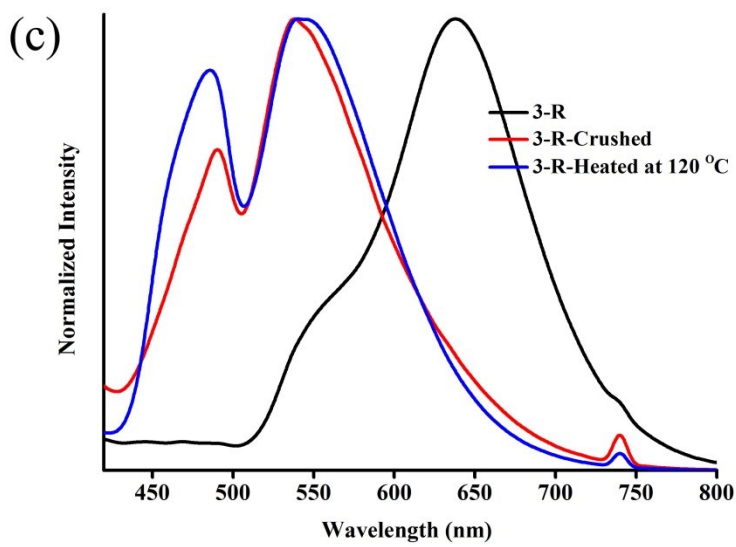

Fig. S36. MFC of (a) 3-Y, (b) 3-O and (c) 3-R.

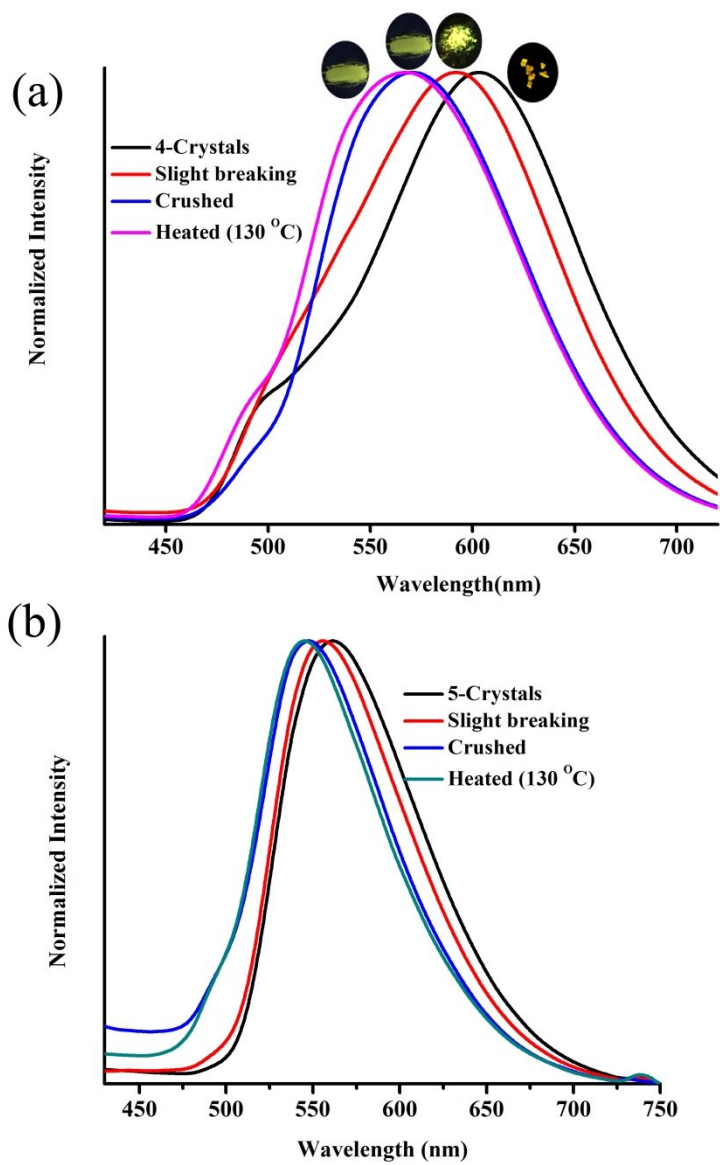

Fig. S37. MFC of (a) 4 and (b) 5.

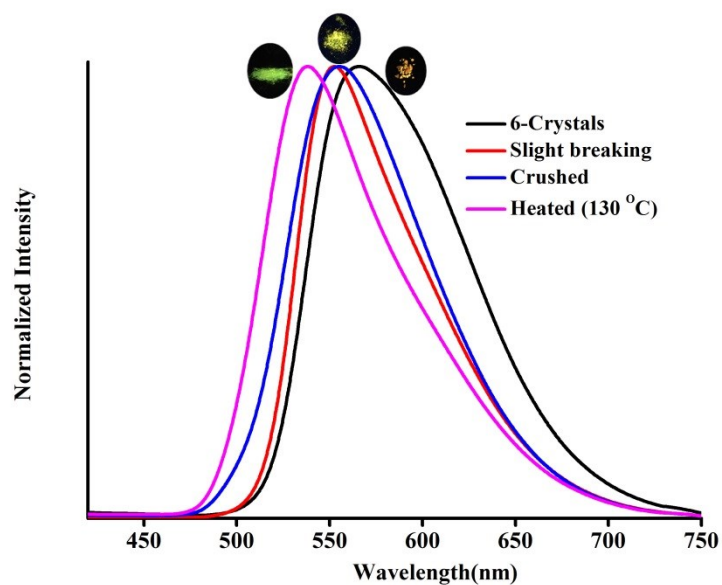

Fig. S38. MFC of 6.

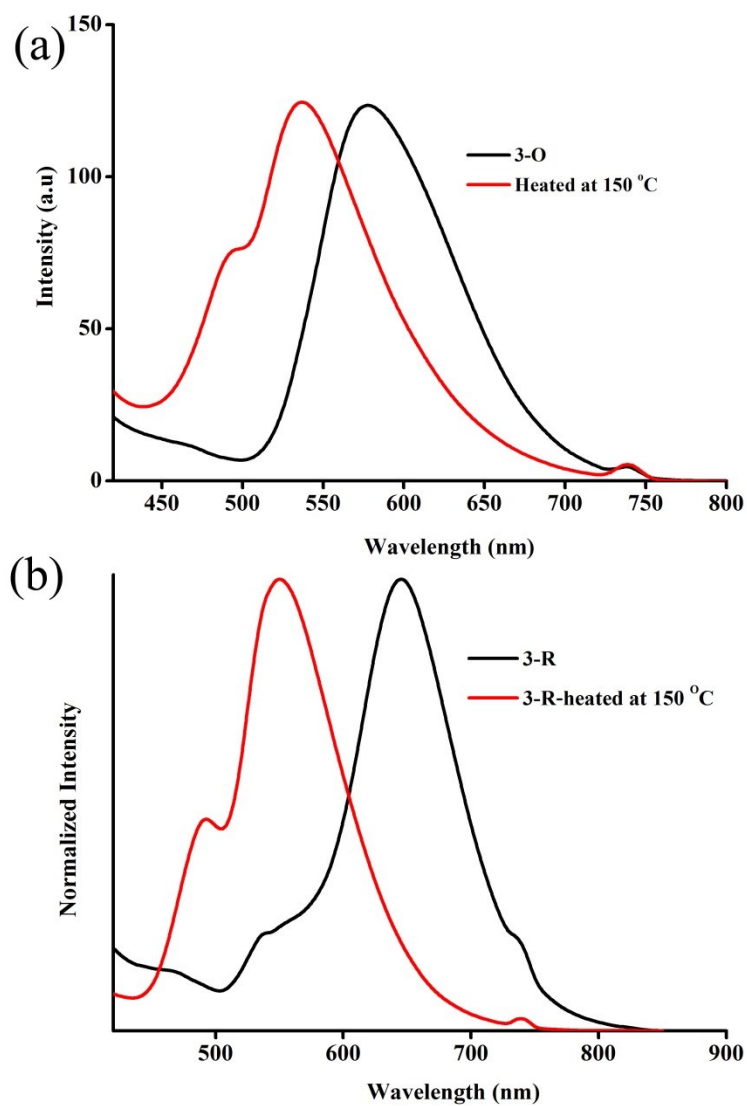

Fig. S39. Change of fluorescence upon heating the crystals of (a) 3-O and (b) 3-R.

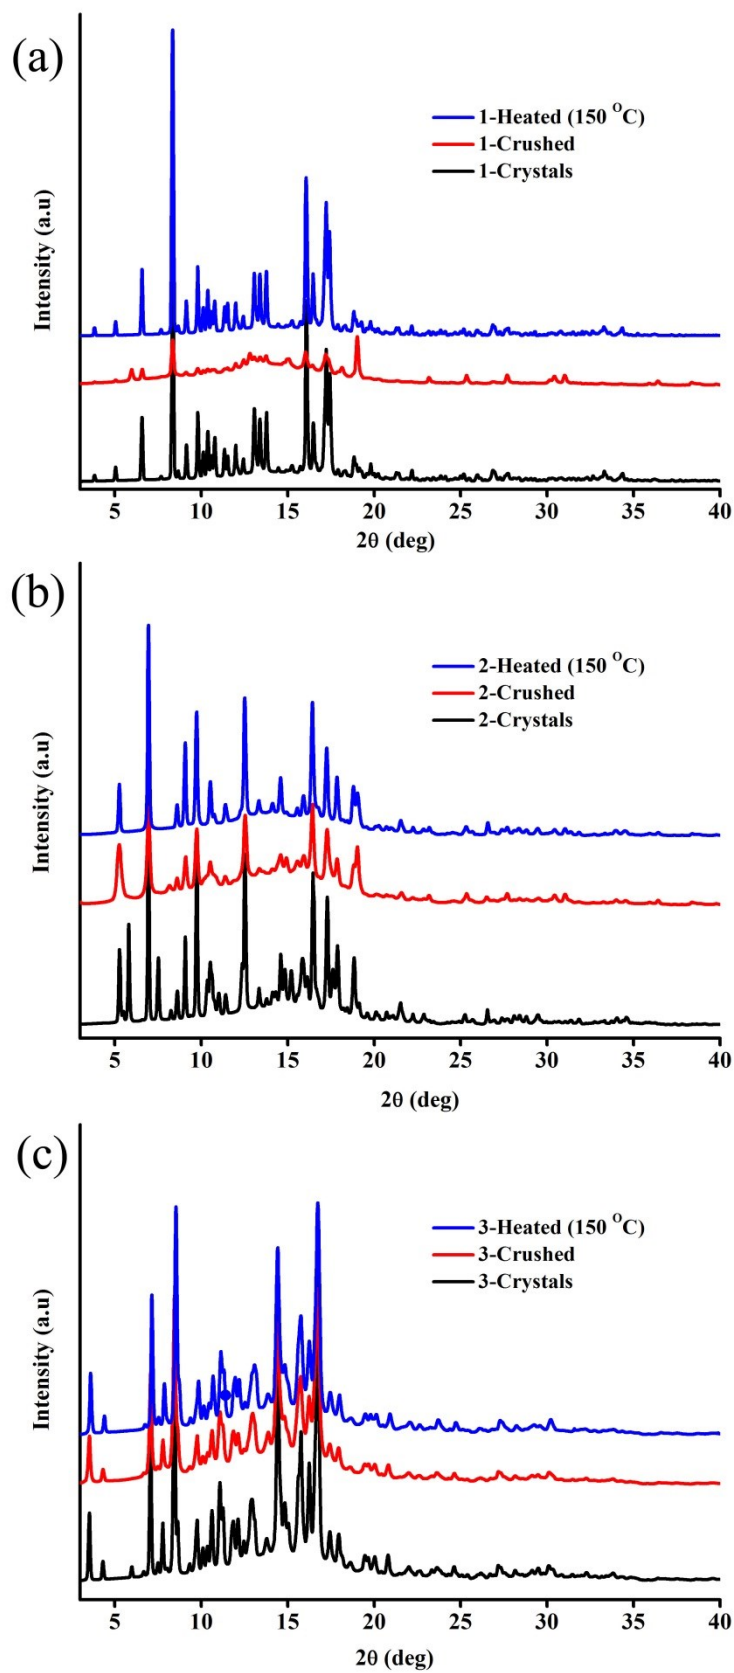

Fig. S40. PXRd patterns of (a) 1, (b) 2 and (c) 3.

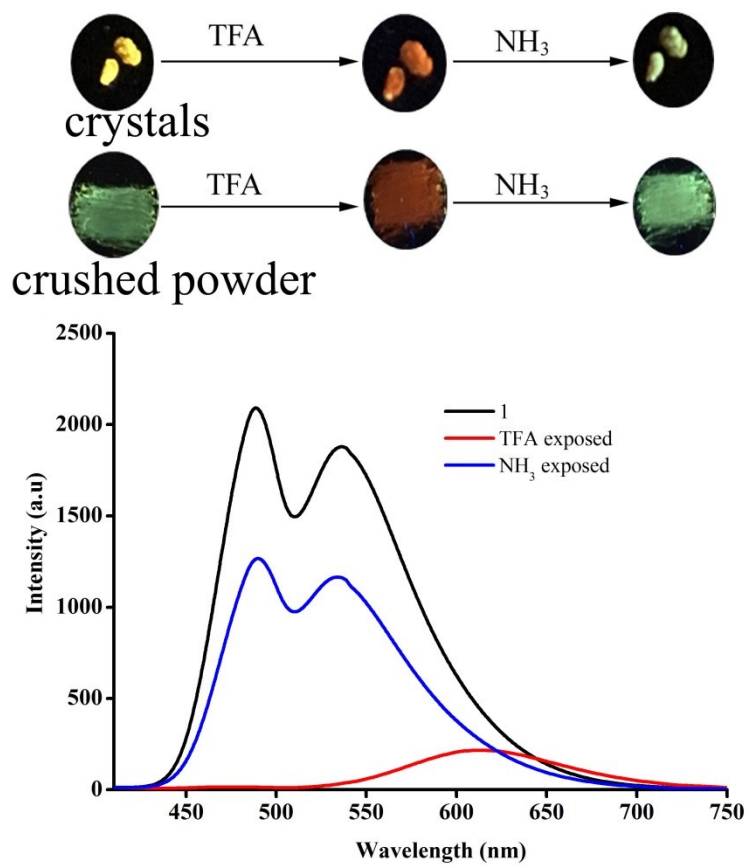

Fig. S41. Halochromic reversible fluorescence switching of **1**.

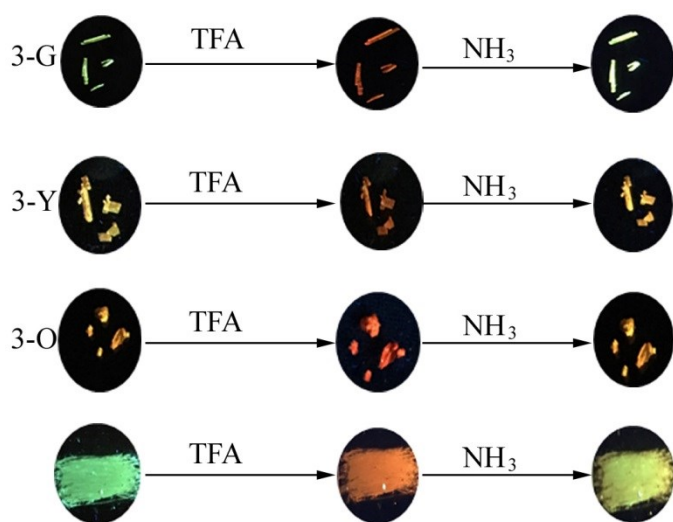

Fig. S42. Halochromic reversible fluorescence switching of **3**.



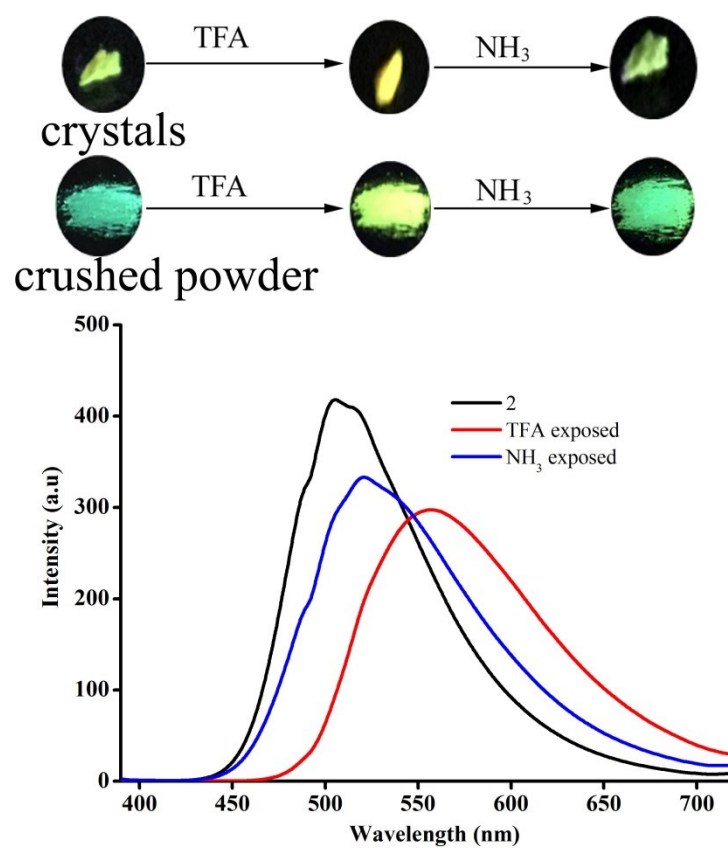

Fig. S43. Halochromic reversible fluorescence switching of 2.

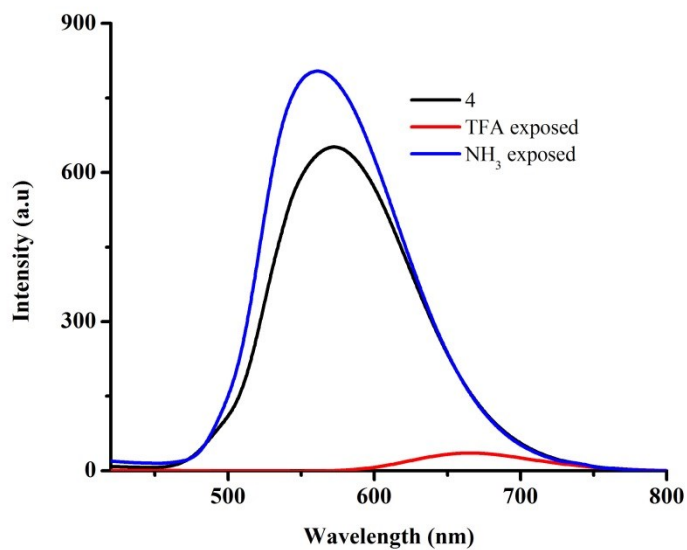

Fig. S44. Halochromic reversible fluorescence switching of 4.

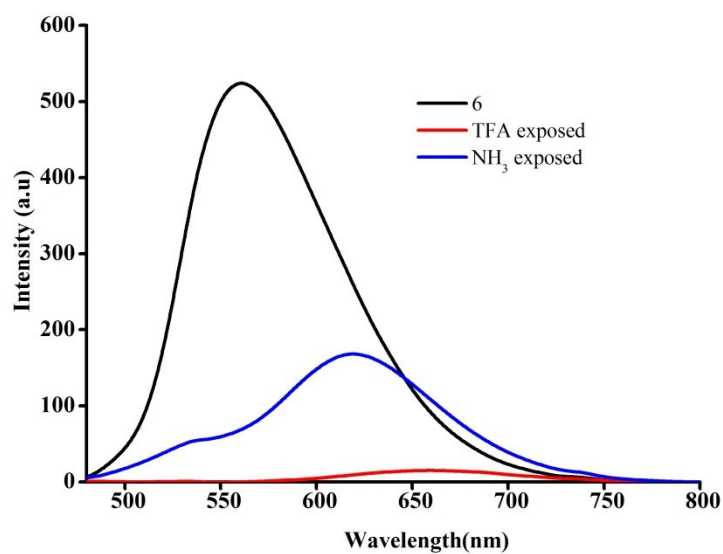

Fig. S45. Halochromic reversible fluorescence switching of **6**.

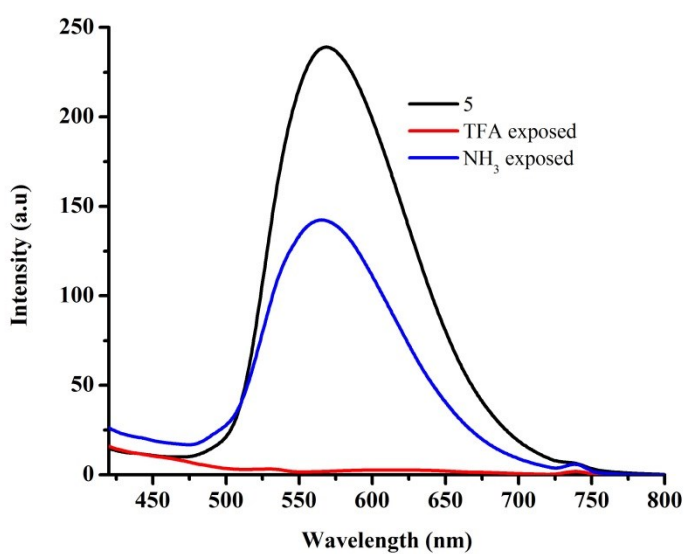

Fig. S46. Halochromic reversible fluorescence switching of **5**.

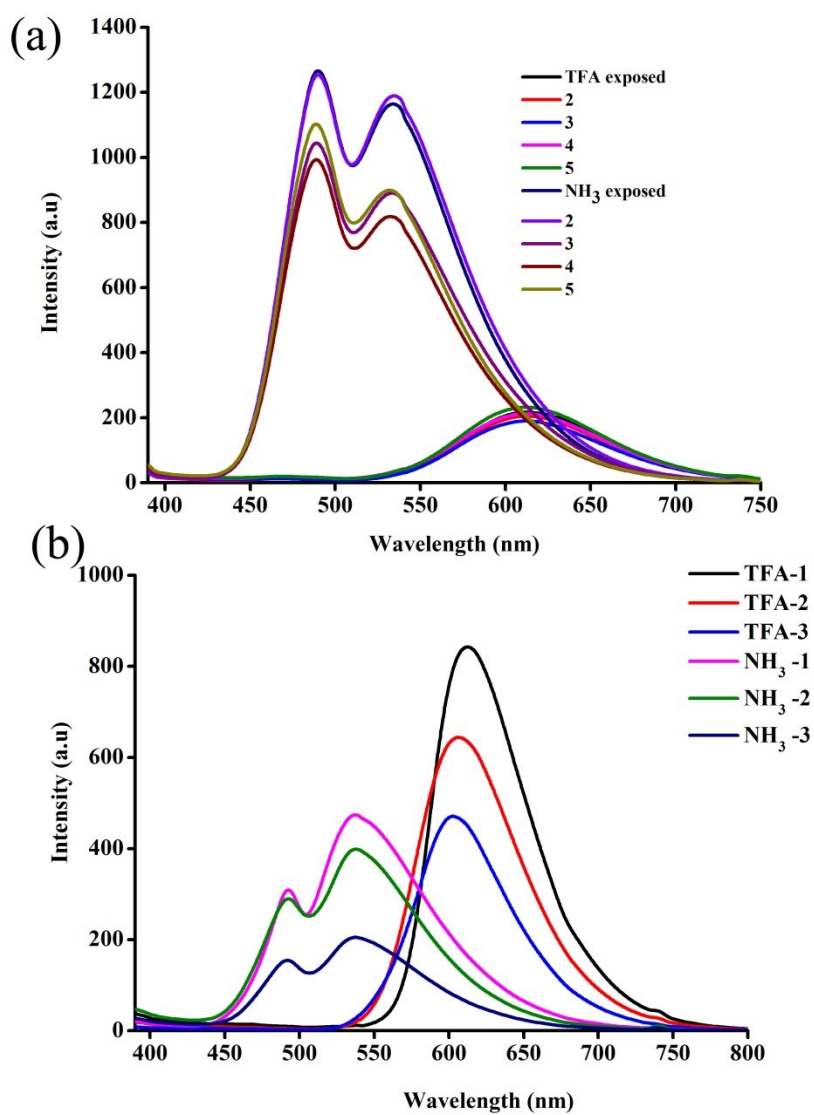

Fig. S47. Halochromic reversible fluorescence switching cycle of (a) **3** and (b) **6**.

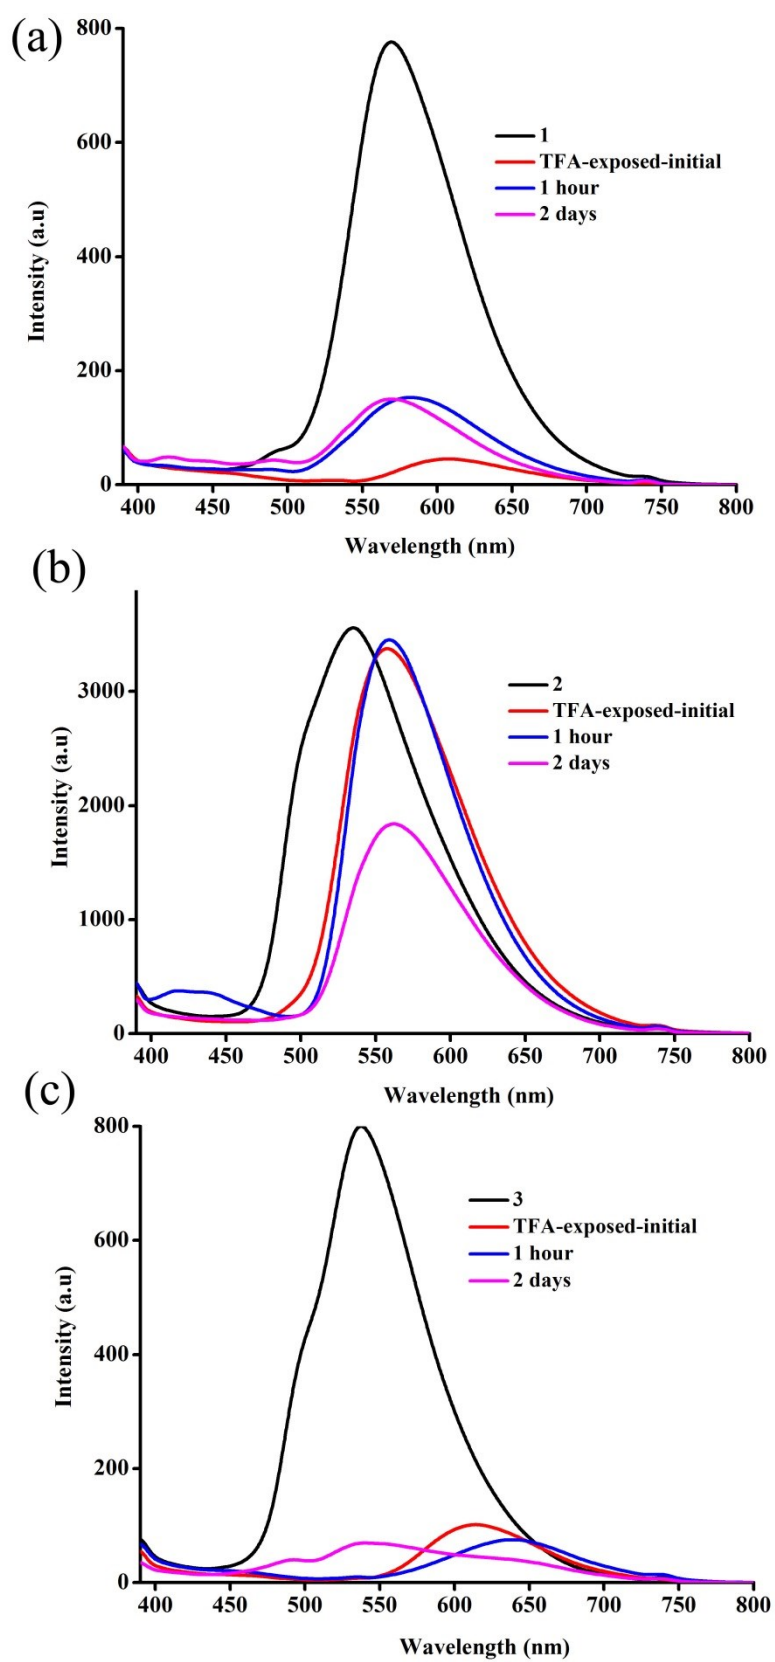

Fig. S48. Halochromic self-reversible fluorescence switching of (a) 1, (b) 2 and (b) 3.

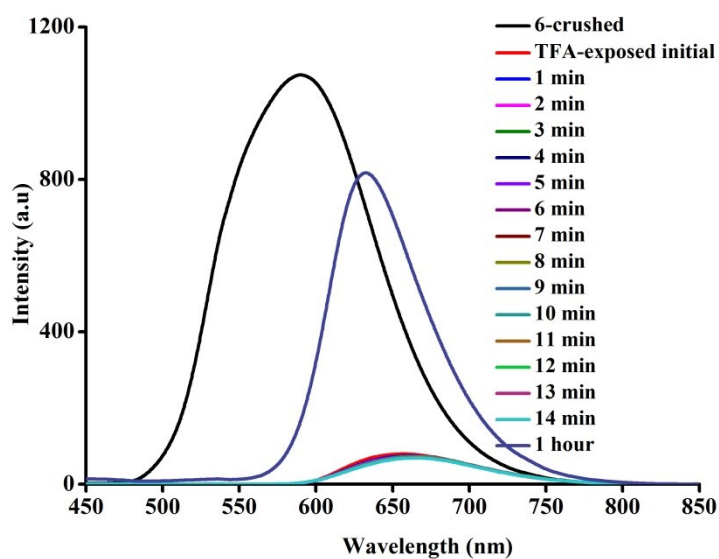

Fig. S49. Halochromic self-reversible fluorescence switching of **6**.

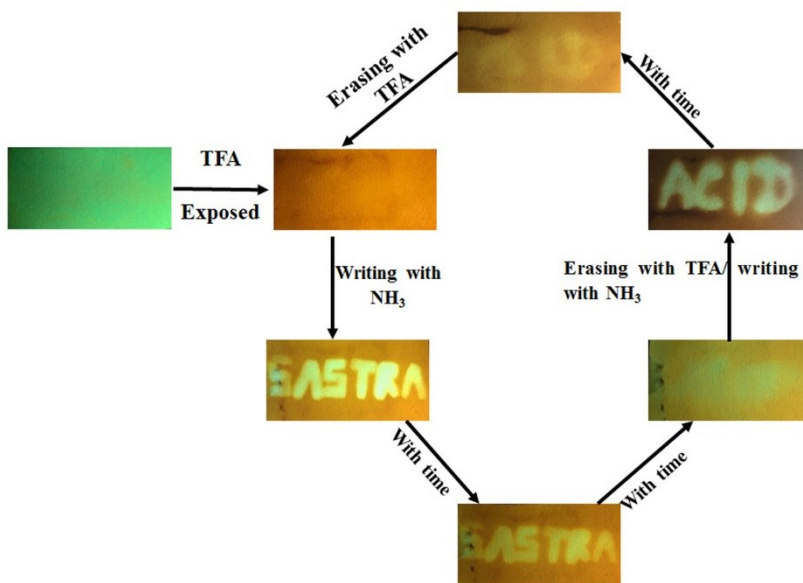

Fig. S50. Fabricating re-writable fluorescent platform using **3-PMMA** on filter paper.

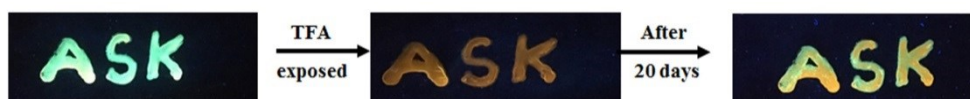

Fig. S51. Fabricating re-writable fluorescent platform using **3-PMMA** on glass plate.

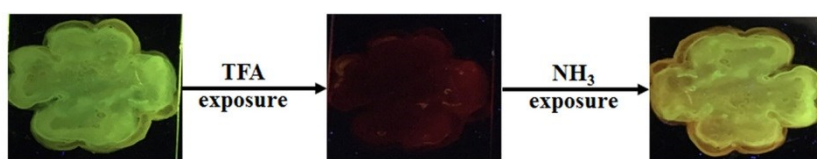

Fig. S52. Fabricating re-writable fluorescent platform using **6-PMMA** on glass plate.

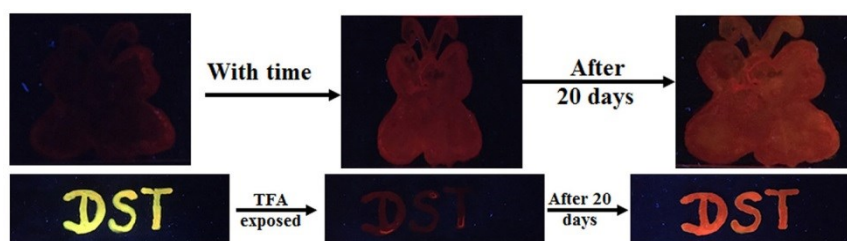

Fig. S53. Change of fluorescence intensity of **6-PMMA** on a glass plate.

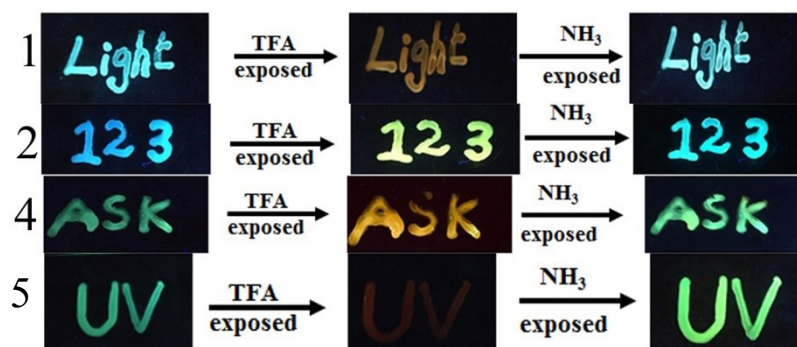

Fig. S54. Halochromic reversible fluorescence switching of **1-PMMA**, **2-PMMA**, **4-PMMA** and **5-PMMA** on a glass plate.
